1 **Runs of Homozygosity in sub-Saharan African populations provide insights into a complex**  
2 **demographic and health history**

3 Francisco C. Ceballos<sup>1</sup>, Scott Hazelhurst<sup>1,3</sup> and Michele Ramsay<sup>1,2</sup>

4 **Affiliations**

5 1. Sydney Brenner Institute for Molecular Bioscience, Faculty of Health Sciences, University of the  
6 Witwatersrand, Johannesburg, South Africa.

7 2. Division of Human Genetics, School of Pathology, Faculty of Health Sciences, University of the  
8 Witwatersrand, Johannesburg, South Africa.

9 3. School of Electrical & Information Engineering, University of the Witwatersrand, Johannesburg, South  
10 Africa.

11 **Correspondence Author:** [ceballoscamina@gmail.com](mailto:ceballoscamina@gmail.com)

12 **Abstract**

13 The study of runs of homozygosity (ROH), contiguous regions in the genome where an individual is  
14 homozygous across all sites, can shed light on the demographic history and cultural practices. We present  
15 a fine-scale ROH analysis of 1679 individuals from 28 sub-Saharan African (SSA) populations along with  
16 1384 individuals from 17 world-wide populations. Using high-density SNP coverage, we could accurately  
17 obtain ROH as low as 300Kb using PLINK software. The analyses showed a heterogeneous distribution of  
18 autozygosity across SSA, revealing a complex demographic history. They highlight differences between  
19 African groups and can differentiate between the impact of consanguineous practices (e.g. among the  
20 Somali) and endogamy (e.g. among several Khoe-San groups<sup>1</sup>). The genomic distribution of ROH was  
21 analysed through the identification of ROH islands and regions of heterozygosity (RHZ). These

---

<sup>1</sup> The term *Khoe-San* is often used in the literature, but is regarded by some as offensive as it conflates two distinct groups. The impact of colonialism had a very traumatic effect on population size and structure. We use the phrase *Khoe and San* to describe people who have either Khoe and/or San ancestry as a neutral term to describe people who live in similar regions and have had some shared history in the last centuries.

22 homozygosity cold and hotspots harbour multiple protein coding genes. Studying ROH therefore not only  
23 sheds light on population history, but can also be used to study genetic variation related to the health of  
24 extant populations.

## 25 **INTRODUCTION**

26 African human genetic diversity provides the ideal backdrop to reconstruct modern human origins, the  
27 genetic basis of adaptation to different environments and the development of more effective vaccines<sup>1</sup>.  
28 Studies on African population genetics and genomics have multiplied over the past decade, boosted by  
29 many efforts to genotype and sequence more populations from the continent<sup>2-4</sup>, though one of the “grand  
30 challenges” of the post-genome era, “To characterize genetic variation among individuals and  
31 populations”<sup>5</sup>, is yet to be fully achieved. Testament to the value of this approach is the recent study of  
32 the deep whole genome sequencing of 24 South African individuals where roughly 0.8M new variants  
33 were identified<sup>6</sup>. Due to the significant advances in genotyping and sampling of African populations, a  
34 study on runs of homozygosity provides an interesting opportunity for a deep dive into the demographic  
35 history of Africans.

36 Runs of homozygosity (ROH) are contiguous regions of the genome where an individual is homozygous  
37 (autozygous) across all sites<sup>7</sup>. ROH arise when two copies of an ancestral haplotype are brought together  
38 in an individual. The size of the ROH is inversely correlated with its age: longer ROH will be inherited from  
39 recent common ancestors while shorter ROH from distant ancestors because they have been broken  
40 down by recombination over many generations. Very short ROH, characterized by strong linkage  
41 disequilibrium (LD) among markers, are not always considered autozygous but nevertheless are due to  
42 the mating of distantly related individuals. A different source of apparent homozygosity, hemizygous  
43 deletions, can masquerade as ROH, but such copy number variation has a minor effect in ROH studies<sup>7-9</sup>.

44 Since their discovery in the mid-1990s<sup>10</sup> ROH were found to be ubiquitous. We are all inbred to some  
45 degree and ROH capture this aspect of our demographic histories, with runs of homozygosity being the  
46 genomic footprint of the phenomenon known as pedigree collapse<sup>11</sup>. ROH are present in all populations,  
47 even in admixed or outbred populations and arise by two different processes: a limited effective  
48 population size ( $N_e$ ) and by consanguineous unions. Independently of how they were generated, ROH can  
49 be used to obtain the genomic inbreeding coefficient or  $F_{ROH}$ <sup>7; 8</sup>. Traditionally, the inbreeding coefficient  
50 (the probability that an individual receives two alleles that are identical-by-descent at a given locus which  
51 is also the expected proportion of the genome being autozygous) is obtained using pedigrees and its  
52 accuracy depends on the depth and reliability of the pedigree<sup>12; 13</sup>.  $F_{ROH}$  measures the actual proportion of  
53 the autosomal genome that is autozygous over and above a specific minimum length ROH threshold.  
54 When this cut-off is set at 1.5Mb,  $F_{ROH}$  correlates most strongly ( $r=0.86$ ) with the  $F$  obtained from an  
55 accurate six-generation pedigree ( $F_{PED}$ )<sup>8</sup>. Using 20-generation depth genealogies with more than 5000  
56 individuals of European Royal dynasties, with many complex inbreeding loops, it has been found that  
57 above the 10<sup>th</sup> generation the change in the coefficient of inbreeding ( $F$ ) is less than 1%<sup>14</sup>. Also, it has been  
58 found that individuals with no inbreeding loops in at least 5 generations (and probably 10) carried ROH  
59 up to 4Mb in length but not longer<sup>8</sup>.  $F_{ROH}$ , using a genomic approach, captures the total inbreeding  
60 coefficient of the individual independently of pedigree accuracy, or depth within the resolution of the  
61 data available and the size of ROH that can be called<sup>7; 15</sup>.

62 The ROH approach provides a window to explore individual and demographic history, to understand the  
63 genetic architecture of traits and diseases and to study concepts in genome biology<sup>7</sup>. Different population  
64 histories give rise to divergent distributions of long and short ROH. The number and length of ROH reflect  
65 individual and population history and have been used to detect consanguineous practices, endogamy and  
66 isolation<sup>7; 9</sup>. ROH were found to be associated with different diseases and traits and its analysis is capable  
67 of detecting directional dominance and inbreeding depression when phenotype data are available<sup>16; 17</sup>.

68 The non-random patterns of the genomic distribution of ROH provides an interesting approach to studying  
69 genome biology<sup>7; 18-20</sup>. As expected, ROH are common in regions of high LD, low recombination and low  
70 genetic diversity<sup>19; 20</sup>. There is an uneven distribution along the genome, with a number of comparatively  
71 short regions with a high population-specific prevalence of ROH – known as ROH islands – on each  
72 chromosome, as well as coldspots with a paucity of ROH<sup>20; 21</sup>. These ROH islands are prevalent in all  
73 populations and dominate the ROH in outbred groups; however they are overshadowed by much larger  
74 ROH arising from recent pedigree loops that are randomly distributed across the genome<sup>7</sup>. In some cases,  
75 ROH islands are due to homozygosity of one common haplotype, but in other cases, multiple haplotypes  
76 contribute to a single ROH island<sup>20</sup>. The origin of these islands is still a subject of debate. In some cases,  
77 the haplotypes segregating at high frequencies in the population may be due to positive selection; for  
78 example, a ROH island around the lactase persistence (*LCT*) gene on chromosome 2q21 was found in  
79 Europeans<sup>21</sup>. In addition, numerous genes that are targets of recent positive selection have been found in  
80 multiple ROH islands in populations around the globe<sup>20</sup>. Another potential biological explanation is that  
81 ROH islands include small inversions that suppress recombination<sup>21</sup>.

82 Sub-Saharan Africa (SSA) is a sub-continent with a complex demographic history where a deep ROH  
83 analysis provides interesting insights. Previous studies on ROH were hampered by small sample sizes and  
84 inadequate African population representation, genotype panels with low SNP coverage, non-optimized  
85 ROH calling conditions and in some cases poor ROH classification and analysis. Gibson et al.<sup>18</sup>, in one of  
86 the first articles that included African samples, published in 2006, used the Hap Map I dataset with 60  
87 Yoruba individuals to conclude that Western Africans had the smallest number of long ROH tracks per  
88 individual, but showed that ROH are common even in outbred populations. Four years later, Kirin et al.<sup>9</sup>  
89 used the Human Genome Diversity Project to analyse five SSA populations: three agricultural heritage and  
90 two hunter-gatherer groups with 82 individuals in total. With a panel of 415K SNPs the study concluded  
91 that populations in SSA have the fewest ROH, for any ROH size, in comparison to other world populations,

92 and that there is an increase in ROH with distance from Africa. The article also suggested that the hunter-  
93 gatherers (17 Biaka and Mbuti pygmies and 15 !Xun San) have a larger ROH burden between 0.5 and 16Mb  
94 compared to farmer communities. Henn et al.<sup>22</sup> used 90 hunter gatherer individuals from three  
95 populations (Hadza, Sandawe and ≠Komani) to calculate the cumulative ROH (cROH) as the sum of ROH  
96 >500kb. They concluded that the Hadza population differ strongly from the other groups and its elevated  
97 mean and variance of cROH is indicative of a severe population bottleneck. Further evidence of the  
98 heterogeneity among the hunter-gathered populations from SSA was reported by Schlebusch et al.<sup>23</sup>.  
99 Using a sliding window of 5Mb and a coverage of 297K SNPs, a minimum length of 500kb and 50kb/SNP  
100 in PLINK they obtained the cROH for 147 individuals from 21 populations (9 farmers and 12 hunter-  
101 gatherer populations). Considering the heterogeneity among hunter-gatherers the study concluded that  
102 northern San groups like /Gui and //Gana, Nama and the two Pygmy populations have generally an  
103 average cROH higher than farming populations for every ROH size class. However, southern San groups  
104 (Karretjie and ≠Khomani) have a lower burden than farmers. In one of the first studies to provide a  
105 meaningful world context of the distribution of ROH, Pemberton et al.<sup>20</sup> analysed 64 worldwide  
106 populations (1839 individuals in total) including 10 from SSA (2 hunter-gatherer and 8 farmer-pastoralist  
107 populations (386 individuals in total)). After identifying ROH by a LOD score methodology, and using a  
108 mixture of three Gaussian distributions, ROH were classified by length into 3 groups: Class A (short ROH  
109 of about tens of kb with an LD origin), Class B (intermediate ROH of hundreds of kb to 2 Mb, resulting from  
110 background relatedness owing to genetic drift) and Class C (long ROH over 1 – 2 Mb arising from recent  
111 parental relatedness). The study concluded that Class A and B ROH increase with distance from Africa, a  
112 trend similar to the negative correlation observed for expected heterozygosity<sup>24</sup>. Class C ROH did not show  
113 this geographical stepwise increase; however, African populations tended to have few ROH in this class.

114 Representation of SSA populations has increased with projects such as the AGVP<sup>2</sup>, 1000 Genomes  
115 Project<sup>25</sup>, the HGDP<sup>26</sup>, the Simons Genome Diversity Project<sup>27</sup>, and others<sup>22; 23; 26; 28</sup>, making it possible to

116 study 3000 individuals in over 60 SSA populations. Recent studies have, however, shown that the  
117 distribution of ROH in SSA may not be as homogeneous as previously thought. Hollfelder et al.<sup>29</sup> genotyped  
118 244 new individuals from 18 Sudanese populations and, notwithstanding some technical issues,  
119 concluded that Coptic, Cushitic, Nubian and Arabic populations from North Sudan have a higher burden  
120 of ROH in comparison to Southern Sudan populations. ROH distribution heterogeneity in SSA was also  
121 shown by Choudhury et al.<sup>6</sup> by analysing roughly 1600 individuals from 28 SSA populations, in a  
122 preliminary superficial exploration. Finally, Ceballos et al.<sup>7</sup> gathered more than 4200 individuals from 176  
123 worldwide populations to analyse ROH distribution. Although this study included 924 SSA individuals from  
124 30 population, the low SNP coverage (147K SNPs) prevented fine-scale analysis, but concluded that some  
125 hunter gatherer populations like the Hadza have a ROH burden similar to the most isolated populations  
126 from Oceania and South America.

127 The objective of this study was to perform fine-scale analysis of the ROH distribution in SSA, in a world  
128 context, in order to learn more about the demographic history of the continent and its populations. Public  
129 data from the Africa Genome Variation Project (AGVP), the 1000 Genome Project (KGP) and Schlebusch  
130 et al. were analysed and included 1679 individuals from 28 SSA populations and 1384 individuals from 17  
131 worldwide populations. By analysing the sum and number of ROH and deconstructing probable patterns  
132 of inbreeding, we present interpretations for the demographic histories of different SSA populations.

133

## 134 **Materials and Methods**

### 135 **Description of the Data**

136 The study included a total of 3063 individuals from 45 populations from the 1000 Genomes Project –  
137 Phase 3 (KGP)<sup>25; 30</sup>, the African Genome Variation Project (AGVP)<sup>2</sup> and Schlebusch et al. (2012)<sup>23</sup>. All

138 individuals were genotyped using the Infinium Omni 2.5 array from Illumina, and all datasets were  
139 subjected to extensive QC procedures.

140 The KGP – Phase 3, includes a total of 1558 individuals from 19 populations<sup>25</sup>. From Europe: FIN (Finish in  
141 Finland, n=97), GBR (British in England and Scotland, n=91), IBS (Iberian populations in Spain, n=99), TSI  
142 (Tuscany in Italy, n=92) and CEU (Utah residents with European ancestry=95). From America: ASW  
143 (Americans of African ancestry in Houston, n=49), ACB (African Caribbean in Barbados, n=72), PUR (Puerto  
144 Rican in Puerto Rico with admixed ancestry, n=72), PEL (Peruvian in Lima, Peru with Amerindian ancestry,  
145 n=50), CLM (Colombian in Medellin, Colombia with admix ancestry, n=65) and MXL (Mexican with  
146 admixed ancestry in Los Angeles, USA, n=47). From South Asia: GIH (Gujarati Indian from Houston, Texas  
147 n=95). From East Asia: CDX (Chinese Han in Xishuangbanna, China, n=83), CHB (Chinese Han in Beijing,  
148 China, n=98), CHS (Southern Han Chinese, n=86), JPT (Japanese in Tokyo, Japan, n=96) and KHV (Kinh in  
149 Ho Chi Minh city, Vietnam n=96). From Africa Guinean Gulf: YRI (Yoruba in Ibadan, Nigeria, n=100), and  
150 from East Africa: LWK (Luhya in Webuye, Kenya, n=74).

151 The AGVP includes 1318 individuals from 17 populations from SSA<sup>2</sup>. Niger-Congo speakers from Western  
152 Africa: Wolof (Senegambian sub-group speakers from The Gambia, n=78), Fula (Senegambian from The  
153 Gambia, n=74), Mandinka (Mande sub-group speakers from The Gambia, n=88) and Jola (Bak sub-group  
154 speakers from The Gambia, n=79). Niger-Congo speakers from the Guinean Gulf: Ga-Adangbe (Kwa sub-  
155 group speakers from Ghana, n=100) and Igbo (Igboid sub-group speakers from Nigeria, n=99). Afro-Asiatic  
156 speakers from the Horn of Africa: Amhara (Semitic sub-group speakers from Ethiopia, n=42), Oromo  
157 (Cushitic sub-group speakers from Ethiopia, n=26) and Somali (Cushitic from Ethiopia and Somalia, n=39).  
158 Niger-Congo speakers from Eastern Africa: Baganda (Bantoid sub-group speakers from Uganda, n=100),  
159 Banyarwanda (Bantoid from Uganda, n=100), Barundi (Bantoid from Uganda, n=97) and Kikuyu (Bantoid  
160 from Kenya, n=99). Nilo-Saharan speakers from Eastern Africa: Kalenjin (Eastern Sudanic sub-group

161 speakers from Kenya, n=100). Niger-Congo speakers from Southern Africa: Sotho (Bantoid from South  
 162 Africa, n=86) and Zulu (Bantoid from South Africa, n=100).  
 163

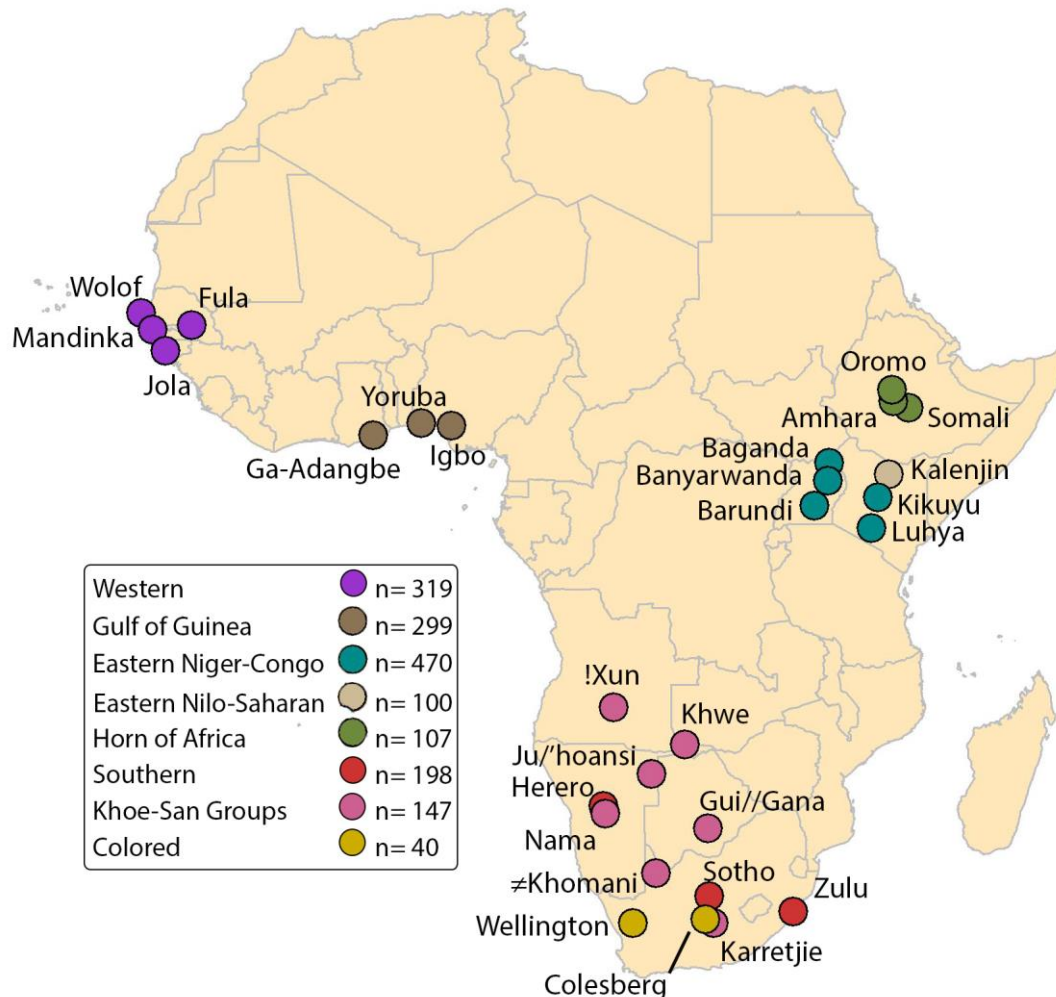

164  
 165 **Figure 1.** Sub-Saharan African populations included in the study: 28 African populations in total including 16 from the African  
 166 Genome Variation Project (AGVP), 2 from the 1000 Genomes Project (KGP) and 10 from Schlesbusch et al. 2012. Populations were  
 167 organized in 8 groups according to their geographic, linguistic and/or admixture origins. Western Africa (shown in deep purple),  
 168 Gulf of Guinea (shown in brown), Eastern Africa Niger-Congo populations (shown in light blue), Eastern Africa Nilo-Saharan  
 169 population (shown in wheat), Horn of Africa (shown in dark green), Southern Africa (shown in red), Khoe and San populations  
 170 (shown in pink) and Colored admixed populations (shown in yellow). The number of individuals from each group is shown in Table  
 171 1.g

172  
 173 In addition, 147 individuals from 7 different groups with Khoe and San ancestry, 40 South African Colored  
 174 individuals (20 from Colesberg and 20 from Wellington, both in South Africa) and 12 Herero Bantoid



175 speakers from Namibia from the Schlebusch study were added <sup>23</sup>. The term Khoe-San designates two  
176 groups of people: the pastoralist Khoe and the hunter-gatherer San<sup>23; 31</sup>. The following were included in  
177 this study: Ju/'hoansi (San Ju speakers from Namibia, n=18), !Xun (San Ju speakers Angola, n=19),  
178 Gui//Gana (San Khoe-Kwadi speakers from Botswana, n=15), ≠Khomani (San Tuu speakers from South  
179 Africa, n=39), Nama (Khoe Khoe-Kwadi speakers from Namibia), Khwe (San Khoe-Kwadi speakers from the  
180 Caprivi strip: Namibia, Angola and Botswana) and Karretjie people (San Tuu speakers from South Africa,  
181 n=20).

182 SSA samples were grouped according to geographic region and principal components analysis into 8  
183 groups (Figure 1): Western Africa (n=319), Gulf of Guinea (n=299), Eastern Africa Niger-Congo populations  
184 (n=470), Eastern Nilo-Saharan population (n=100), Horn of Africa (n=107), Southern Africa (n=198), Khoe  
185 and San groups (n=147) and Colored South Africans (n=40). KGP populations from the rest of the world  
186 were grouped as follows: Mixed African-American populations (n=121), Europeans (n=474), Southern  
187 Asians (n=95), Eastern Asians (n=459), South Americans (n=50) and Mixed Hispanic-Americans (n=184).

188 Since the three datasets used in this study were genotyped using the same SNP genotyping array they  
189 could easily be merged <sup>15; 16</sup>. Only autosomal SNPs were included in this analysis. For each population,  
190 array data were filtered to remove SNPs with minor allele frequencies < 0.05 and those that divert from  
191 H-W proportions with  $p < 0.001$ . This filtering serves to limit the effects of ascertainment bias caused by  
192 the small number of individuals in the SNP discovery panel. After QC, there were 1.3M SNPs on average  
193 in Western Africa populations, 1.4M in Gulf of Guinea, 1.4M in Eastern Africa Niger-Congo populations,  
194 1.4M in Eastern Nilo-Saharan population, 1.3M in Horn of Africa populations, 1.3M in Bantu-speaking  
195 Southern Africa populations, 1.4M in Khoe and San populations from Southern Africa, 1.4M in Colored  
196 populations from Southern Africa, 1.4M in Africa-American admixed populations, 1.2M in European  
197 populations, 1.2M in southern Asia populations, 1.1M in Eastern Asian populations, 1.1M in South  
198 America populations and 1.2M in Hispanic-American admixed populations.

## 199 **Merging with the Human Genome Diversity Project Data**

200 To enrich the data further we merged the above datasets (KGP, AGVP and Schlebusch) with the Human  
201 Genome Diversity Project dataset (HGDP)<sup>26</sup> since this dataset includes isolates and urban populations  
202 from across four continents. The HGDP includes 1043 individuals from 51 populations from different parts  
203 of the world: 6 populations from Europe, 4 from the Middle East, 10 from Central and South Asia, 17 from  
204 East Asia, 7 from Africa, 2 from Oceania and 5 from Africa. 650K SNPs were genotyped in these populations  
205 using the Illumina BeadStation technology. After merging all datasets and filtering for MAF and H-W  
206 proportions we have a dataset of 4106 individuals with genotypes for 382,840 SNPs. In order to  
207 differentiate it from the main dataset described above, this merged dataset is called “*worldata0.3*”.

## 208 **Identification of runs of homozygosity**

209 The observational approach implemented by PLINK v1.9<sup>32</sup> was used to call ROH. The simplicity of the  
210 approach used by PLINK allows efficient execution on data from large consortia and even different array  
211 platforms or sequencing technologies<sup>7; 16</sup>. Tests on simulated and real data showed that the approach  
212 used by PLINK outperformed its competitors in reliably detecting ROH<sup>33</sup>.

213 The following PLINK conditions were applied to search for ROH:

214 `--homozyg-snp 30`. Minimum number of SNPs that a ROH is required to have

215 `--homozyg-kb 300`. Length in Kb of the sliding window

216 `--homozyg-density 30`. Required minimum density to consider a ROH (1 SNP in 30 Kb)

217 `--homozyg-window-snp 30`. Number of SNPs that the sliding window must have

218 `--homozyg-gap 1000`. Length in Kb between two SNPs in order to be considered in two different  
219 segments.

220 `--homozyg-window-het 1`. Number of heterozygous SNPs allowed in a window

221 `--homozyg-window-missing 5`. Number of missing calls allowed in a window

222 `--homozyg-window-threshold 0.05`. Proportion of overlapping window that must be called  
223 homozygous to define a given SNP as in a “homozygous” segment.

224 The objective of this study is to use autozygosity to learn more about demographic history in SSA  
225 populations. To achieve this goal short and long ROH need to be explored, since they provide different  
226 types of information<sup>7; 15</sup>. The high SNP coverage of 1.2M SNPs on average for all the populations included  
227 in the study, makes it possible to find a single SNP, on average, in a track of 2.4 Kb. The Supplemental  
228 Methods and Figures S1, S2, S3, S4 and S5 demonstrate that this coverage allows accurate detection of  
229 ROH longer than 300 Kb by considering 30 as a minimum number of SNPs per ROH and/or the required  
230 minimum SNP density to call ROH. To obtain a window with 30 SNPs, on average (assuming a  
231 homogeneous distribution of SNP along the genome), a tract of just 72 Kb is needed. A threshold of 300  
232 Kb was set for the minimum length in order to capture small ROH originating far in the past and also to  
233 ensure that these are true ROH that originated by genetic drift or consanguinity. An alternative source of  
234 homozygosity originating from linkage disequilibrium (LD) typically produces tracts measuring up to about  
235 100 Kb, based on empirical studies<sup>34-36</sup>. By using a minimum-length cutoff of 300 Kb, most short ROH  
236 resulting from LD will be eliminated.

### 237 **Analyses**

238 Different variables were obtained and analyses performed in order to fully exploit the usefulness of the  
239 ROH in the understanding of demographic history and possible cultural practices of populations. First, we  
240 obtained the total sum of ROH for six ROH length classes: 0.3 – 0.5, 0.5 – 1, 1 – 2, 2 – 4, 4 – 8 and >8 Mb.  
241 This exploratory data analysis allows us to delve into aspects of population history, since, due to  
242 recombination, the size of a ROH is inversely proportional to its age. Thus, plotting the total sum of ROH  
243 for these size classes will inform, for example, the relative change of the effective population size across  
244 generations.

245 We also conducted a preliminary examination at a global level using *worldata.03*. The interest in this  
246 exploratory data analysis is to provide a rough relative comparison among populations not an absolute  
247 quantification, as the lower SNP density affects the accuracy of analysis (it is apparent in Figure S6 that

248 very short and large ROH are underestimated in *worldata.03* due to the lower SNP coverage, and the  
249 degree of bias depends on the population and its genetic characteristics). However, in further analysis,  
250 where absolute quantification and comparison is mandatory in order to obtain meaningful conclusions,  
251 the underestimation of short and very long ROH prevents the use of *worldata.03*.

252 For comparison purposes four variables were defined: (1) *Mean number of ROH* as the population average  
253 number of ROH longer than 1.5 Mb; (2) *Mean ROH size* as the population average size of ROH longer than  
254 1.5Mb; (3) *Total sum of ROH>1.5 Mb* as the population average total sum of ROH longer than 1.5 Mb; and  
255 (4) *Total sum of ROH<1.5* as the population average total sum of ROH shorter than 1.5 Mb. Exploratory  
256 data analysis and data representation were illustrated using violin plots. These plots combine a box plot  
257 with a kernel density plot, where the interval width is obtained by the rule of thumb. The violin plot shows  
258 a colored density trace with the interquartile range as a black line and median as a white dot. This  
259 representation is especially useful when dealing with asymmetric distributions where median is more  
260 informative than the mean. Statistical comparisons between total sum of ROH longer and shorter than  
261 1.5 Mb between populations and geographic regions were performed using the Whitney-Wilcoxon non-  
262 parametrical test (MWW). All the analyses were performed using R (v.3.4.1)<sup>37</sup>.

### 263 **Measuring different sources of inbreeding**

264 Population geneticists use the word inbreeding to mean different things, as pointed out by Jacquard and  
265 Templeton in their respective classic articles<sup>38; 39</sup>. Inbreeding can be produced by a deviation from  
266 panmixia, in what G. Malecot called systematic inbreeding, or by genetic drift and low effective population  
267 size, also called panmictic inbreeding<sup>40</sup>. Systematic inbreeding has a direct effect on the H-W proportions  
268 of a population and can be measured using the Wright's fixation index or  $F_{IS}$ <sup>41</sup>. In this study this component  
269 of the total inbreeding coefficient is measured using the --het function in PLINK. In this context  $F_{IS}$  is the  
270 average SNP homozygosity within an individual relative to the expected homozygosity of alleles randomly  
271 drawn from the population. PLINK use the following expression:

272 
$$F_{IS} = \frac{Observed\ Hom - Expected\ Hom}{N - Expected\ Hom}$$

273 where *Observed Hom* is the observed number of homozygous SNPs, *Expected Hom* is the expected  
274 number of homozygous SNPs considering H-W proportions and *N* is the total number of non-missing  
275 genotyped SNPs.  $F_{IS}$  thus measures inbreeding in the current generation with  $F_{IS} = 0$  indicating random  
276 mating,  $F_{IS} > 0$  indicating consanguinity and  $F_{IS} < 0$  indicating inbreeding avoidance.

277 The two different sources of inbreeding, namely, genetic drift (denoted by  $F_{ST}$ ) and non-random mating  
278 ( $F_{IS}$ ) are both components of the total inbreeding coefficient ( $F_{IT}$ ), defined as the probability than an  
279 individual receives two alleles that are identical-by-descent. Sewall Wright developed an approach to  
280 consider these three different F coefficients in his F statistics  $(1-F_{IT})=(1-F_{IS})(1-F_{ST})$ <sup>41; 42</sup>. First defined as  
281 correlations, Nei showed how these coefficients can be expressed in terms of allele frequencies and  
282 observed and expected genotype frequencies<sup>43</sup>. In this framework,  $F_{ST}$  can be considered a measure of  
283 the genetic differentiation of a subpopulation in comparison with an ideal population with a large  $N_e$ .  $F_{IT}$   
284 is the total inbreeding coefficient, traditionally obtained using deep genealogies, and can be calculated  
285 using the  $F_{ROH}$  ( $ROH > 1.5Mb$ ):

286

287 
$$F_{ROH} = \frac{\sum_{i=1}^n l_i}{len\ autosomal\ genome}$$

288 Where the numerator is the sum of n ROH of length  $l_i$  ( $>1.5Mb$ ) and the denominator is the total autosomal  
289 length.

### 290 **Genomic distribution of ROH**

291 The study of the genomic distribution of ROH can be used for different purposes. By identifying the regions  
292 where ROH are very prevalent, or completely absent in the population it is possible to identify candidate  
293 regions (including protein coding genes) under selection. Furthermore, the identification of common and  
294 unique ROHi in the different regional groups considered in this study can also shed light on population

295 demographic history. In order to study the spatial distribution of ROH across the genome two different  
296 variables were defined: islands of runs of homozygosity (ROHi) and regions of heterozygosity (RHZ) (see  
297 definitions below). In order to identify protein coding genes in these regions *biomartR* package for R was  
298 used. Differences in ROHi and RHZ between populations were used as genetic distances as a source to  
299 build a rooted dendrogram by using optimal leaf ordering (OLO) for hierarchical clustering available in the  
300 *heatmaply* R package<sup>44</sup>. The OLO clusters similar groups (or leaves) taken from the UPGMA (Unweighted  
301 Pair Grouping with Arithmetic Mean) algorithm and yields the leaf order that maximizes the sum of the  
302 similarities of adjacent leaves in the ordering<sup>45</sup>.

### 303 **Islands of Runs of Homozygosity (ROHi)**

304 ROHi are defined as regions in the genome where the proportion of individuals of a population have ROH  
305 in a specific region that is more than expected by a binomial distribution. In order to search for ROHi a  
306 sliding window of 100 Kb was used. In every 100 Kb genomic window the number of people with ROH was  
307 obtained; and to know if a specific genomic window has a significant enrichment of ROH across the  
308 population, a binomial test with  $P < 2 \times 10^{-7}$  with Bonferroni correction for 2500 windows was applied.  
309 According to this procedure two variables could introduce bias when comparing populations across the  
310 globe: different population sizes and ROH background. In order to mitigate this source of bias the  
311 following steps were followed. Firstly, ROH of all the populations by geographical area and admixture  
312 were collapsed creating the following groups: Europe (n=474 individuals), Eastern Asia (n=459 individuals),  
313 Admixed African-American (n=121 individuals), Western Africa (n=319 individuals), Africa Guinea Gulf  
314 (n=299 individuals), Horn of Africa (n=107 individuals), Eastern Africa (n=570 individuals), Southern Africa  
315 (n=217 individuals), Khoe and San (n=148 individuals) and Admixed Hispanic-American (n=184  
316 individuals). Secondly, ROH from 100 people in each group were resampled 100 times. Thirdly, statistically  
317 significant windows were obtained following the above methodology. Finally, consecutive windows found  
318 to be statistically significant in at least 50 resampling events were considered as part of the same ROHi.

319 In order to compare ROHi between populations it was considered that two ROHi from two different  
320 populations are indeed the same ROHi if they share at least 50% of their length. Results were compared  
321 using an alternative value of 75% without significant changes (data not shown).

### 322 **Regions of Heterozygosity (RHZ)**

323 RHZ are defined as regions in the genome where < 5% of individuals in a population have ROH. In order  
324 to search for RHZ an extra step of QC consisting of removing the SNPs in LD using PLINK was performed  
325 before calling for ROH. For this analysis, ROH longer than 100 Kb were called using 25 SNPs per window  
326 in PLINK. With this procedure all ROH longer than 100 Kb, independent of their origin (LD or IBD), were  
327 detected with accuracy due to the SNP coverage available. Removing SNPs in LD, on average 1.1M SNPs  
328 were still available for every population, enabling detection of ROH longer than 100 Kb (2.8 Kb per SNP,  
329 in 100 Kb would be on average 35 SNPs, and a window of 25 SNPs is appropriate to cover genomic regions  
330 with less than the average number of SNPs). Once every ROH is called, it is straightforward to obtain  
331 regions outside ROH, and since SNPs in LD were pruned, these regions will be mostly heterozygous. In  
332 order to only identify informative heterozygous haplotypes, regions that have anomalous, unstructured,  
333 high signal/read counts in next generation sequence experiments were removed. These 226 regions,  
334 called ultra-high signal artifact regions, include high map-ability islands, low map-ability islands, satellite  
335 repeats, centromere regions, snRNA and telomeric regions<sup>46</sup>. Regions not covered by the Human Omni  
336 Chip 2.5 were also removed from the analyses (Like p arms of chromosomes 13, 14, 15, 21 and 22). By  
337 moving a 100 Kb window through the genome, two different cutoffs were considered to call RHZ in each  
338 window: no individual is in homozygosis (RHZ 0%) or 5% or less of the individuals are in homozygosis (RHZ  
339 5%). Consecutive windows that fulfill this requirement were considered part of the same RHZ.

340

341

342

## 343 **Results**

### 344 **Comparison of different ROH sizes across world populations**

345 Data analysis of mean total lengths (sum of ROH) of different ROH length classes were plotted (Figure 2).  
346 Three different situations were considered:  $ROH < 1Mb$ ,  $1 < ROH < 4Mb$  and  $ROH > 4Mb$ . Within Sub-Saharan  
347 Africa (SSA), Figure 2A shows different scenarios for short ( $< 1Mb$ ) and long ( $> 4Mb$ ) ROH: short ROH,  
348 unlike the long ROH, display differences between regions and commonality among them. The populations  
349 with the longest average sum of short ROH are from the Horn of Africa (Amhara, Oromo, Somali).  
350 Populations from Western Africa, Gulf of Guinea, Eastern Africa and Southern Africa, in this order and  
351 with slight differences, have intermediate levels of short ROH, and Colored populations from South Africa  
352 are the ones with the lowest levels of short ROH. Populations from these regions are reasonably  
353 homogeneous, unlike the Khoe and San populations. A completely different situation arises when long  
354 ROH ( $> 4 Mb$ ) are considered, in this case no population or geographic structure is observed. Three  
355 populations, Wolof and Fula, from western Africa, and Somali from the Horn of Africa, present the largest  
356 mean total length. Differences between long and short ROH can also be seen when considering  
357 populations around the world (Figure 2B). African populations have the smallest mean total length of  
358 ROH, but this applies only to short ROH. When considering long ROH, African populations like the Wolof,  
359 Fula and Somali have mean total lengths larger than most of the KGP populations. Just the indigenous but  
360 partially admixed populations from Lima, Peru (PEL), had a larger mean total ROH length. Interestingly,  
361 for the vast majority of the populations the mean total length of very short ROH (0.3 to 0.5 Mb) is several  
362 times larger than the mean total length for long ROH ( $> 4Mb$ ). This is not the case for the Khwe, Wolof  
363 and Fula populations.

364

365

366



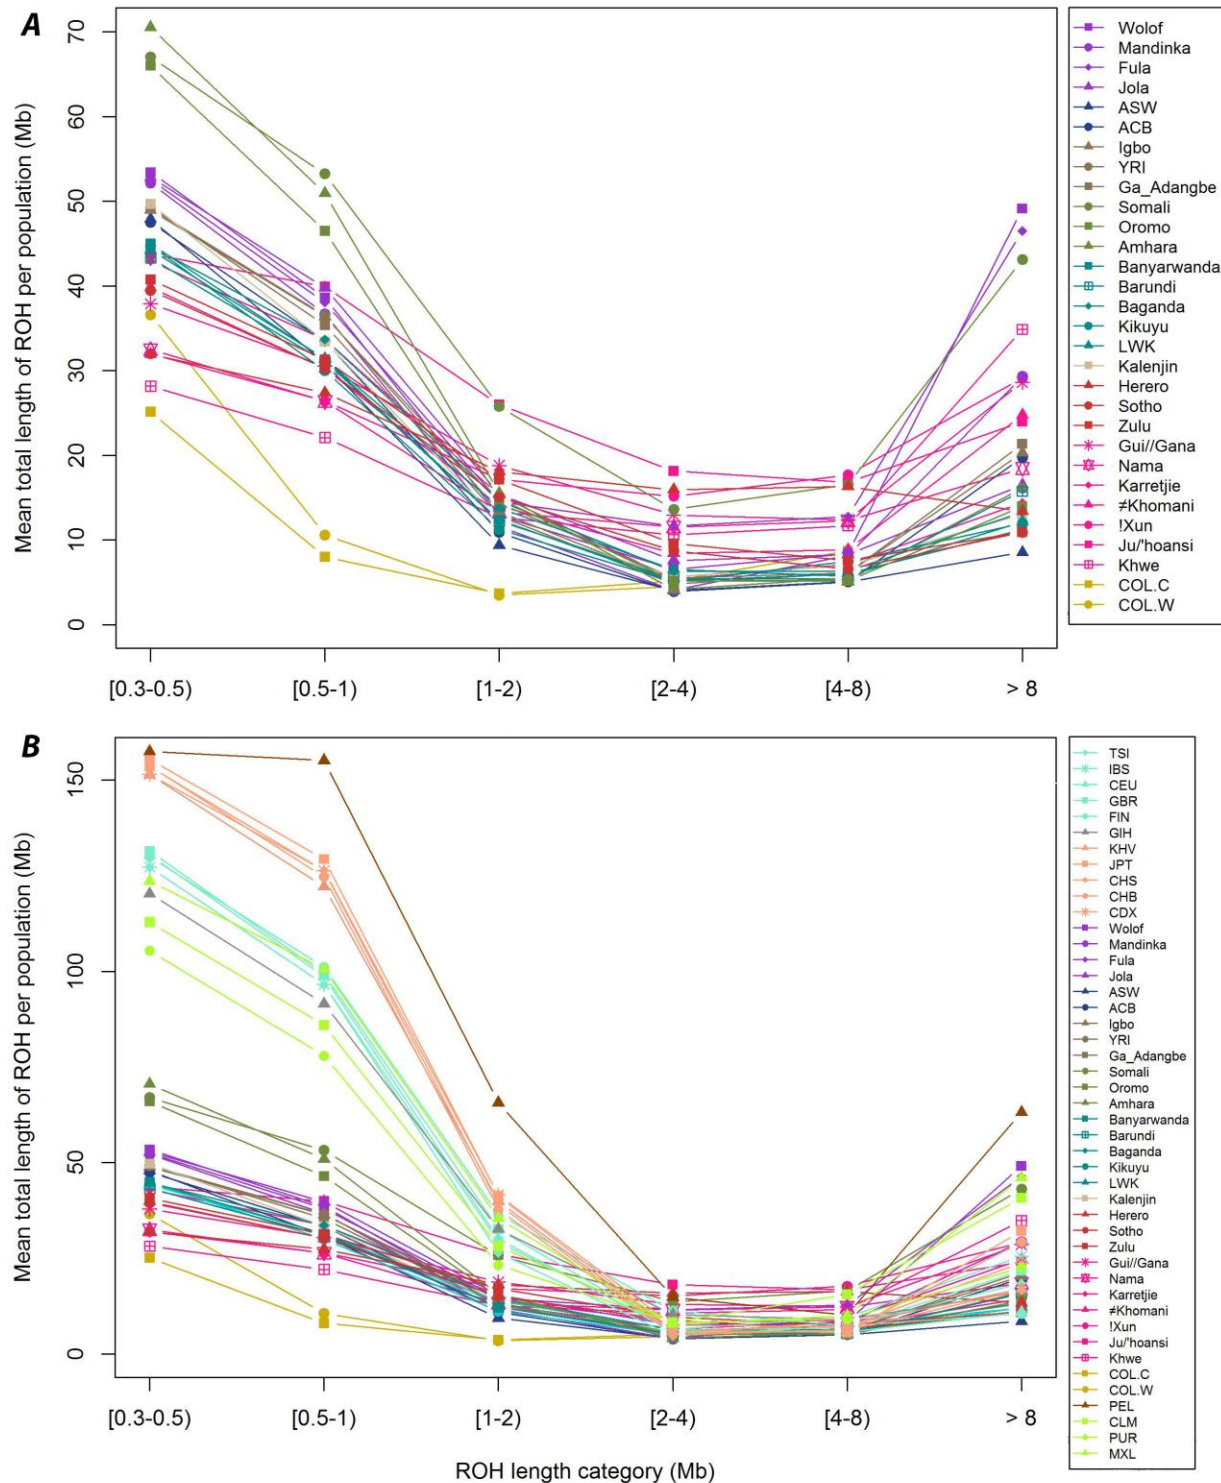

367

368 **Figure 2.** Mean total length of ROH over 6 classes of ROH tract lengths. ROH classes:  $0.3 \leq ROH < 0.5$  Mb,  $0.5 \leq ROH < 1$  Mb,  $1 \leq ROH < 2$   
 369 Mb,  $2 \leq ROH < 4$  Mb,  $4 \leq ROH < 8$  Mb and  $ROH \geq 8$  Mb. A. Sub-Saharan African populations and admixture populations with African  
 370 ancestry (ASW and ACB, shown in dark blue). Color coding corresponds to the legend in Figure 1. B. All populations from the KGP,  
 371 AGVP and Schlesbusch et al. 2012. European populations are shown in aquamarine, Southern Asian population (GIH) is shown in  
 372 grey, Eastern Asia populations are shown in light salmon, South America population (PEL) is shown in dark orange, admixture  
 373 Hispanic – American populations are shown in light green.

374 Medium size ROH (ROH between 1 a 4 Mb) (Figure 2) also reveals interesting differences. At a population  
375 level, the Khoe and San groups like Ju/'hoansi, !Xun and Khwe, have a higher mean total length for ROH  
376 from 2 to 8 Mb, even higher than PEL. Medium size ROH also show an interesting global pattern: a  
377 considerable reduction in mean total length of ROH can be seen for all populations across the globe, and  
378 there are no big differences between populations for mean total length for those ROH length classes.  
379 Considering the limitations of the KGP dataset to represent world populations, the HGDP was added to  
380 the exploratory analysis (Figure 3). In this dataset it is possible to find very isolated populations from  
381 Oceania and America and a better representation of Asian populations. Figure 3 shows the same tendency  
382 even in very isolated populations, like the African Hadza, who also have a reduction in medium size ROH.

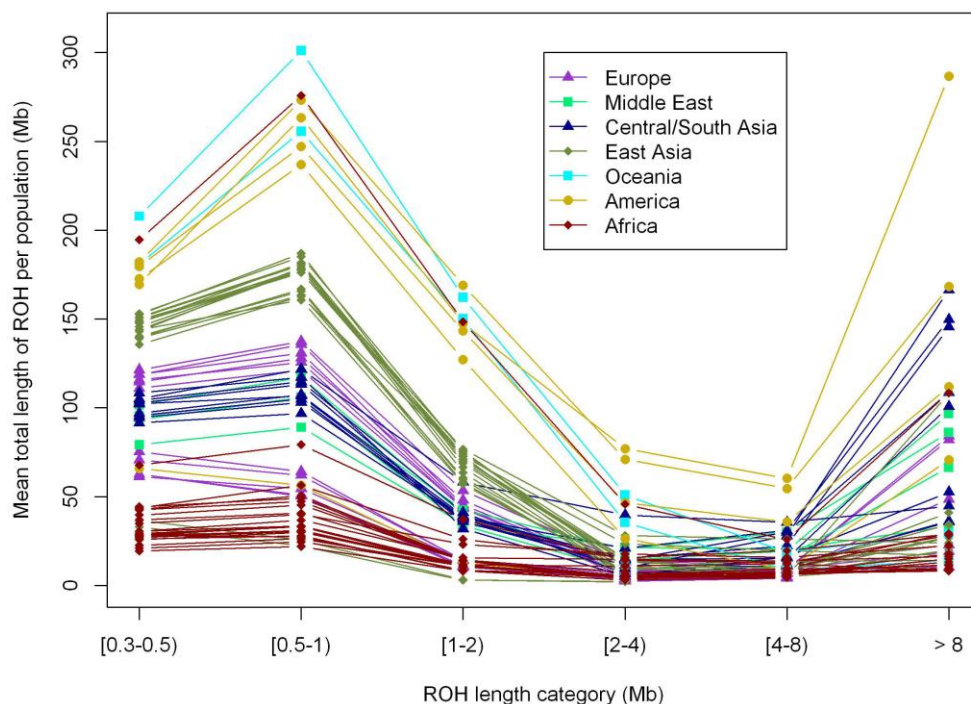

383

384 **Figure 3.** Mean total length of ROH over 6 classes of ROH tract lengths for the merged dataset of AGVP, KGP, Schlesbusch and  
385 HGDP (worlddata.03, see text in the Materials and Methods section). Europe populations are shown in deep purple, Middle east  
386 populations are shown in deep purple, Middle east populations are shown in light green, Central and South Asia populations are  
387 shown in dark blue, Eastern Asia population are shown in dark green, Oceanic populations are shown in light blue, American  
388 populations are shown in yellow and African ones are shown in red.

389

390

391 **Violin Plots: Exploratory data analysis and non-parametrical comparisons**

392 Using violin plots, it is possible to examine the distribution of ROH in SSA. Figure 4 represents the  
393 distributions and medians, complemented with the mean and standard deviations in Table 1. Within SSA  
394 the population with the greatest number of ROH (for ROH longer than 1.5Mb) is the Khoe-San Ju/'hoansi  
395 (median=14.5, mean=15.1). Considering populations from around the globe, only PEL has a higher number  
396 of ROH (median=18, mean=17.9). The Khoe-San populations, in general, are the ones with a higher  
397 number of ROH in SSA; however, they also show great variability. For example, both San Tuu speaker  
398 populations, ≠Khomami and Karretjie, have a considerably smaller number of ROH (median=6, mean=6.7  
399 and median=4, mean=5.15 respectively). Besides Khoe and San populations we observe other populations  
400 like Somali and Herero with a large number of ROH (median=13, mean=13.6 and median=13.5, mean=13.3  
401 respectively). Among SSA we find great variability, for example, populations like the Fula have a smaller  
402 number of ROH (median=6, mean=8.4) but with a long right tail (sd=7.2) which indicates great variability  
403 within the population (Figure 4). These right tails of the distribution are even longer when considering the  
404 mean size of ROH (ROH>1.5Mb). Populations from Western Africa (Fula, Wolof and Mandinka) present  
405 the longest right tails along with the TSI population from the Iberia peninsula in Europe (Table1).

406

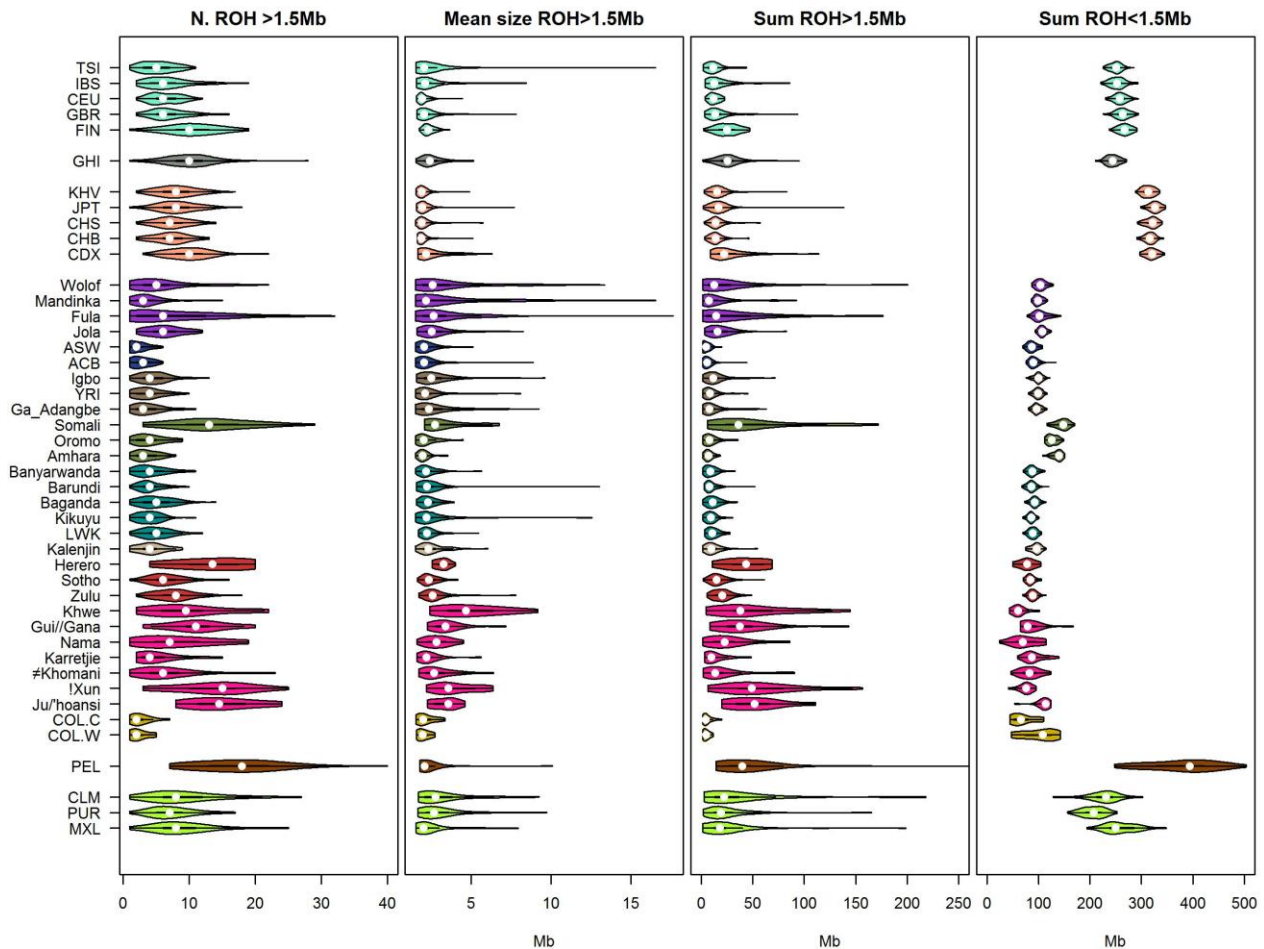

407

408 **Figure 4.** Violin plots showing the distribution of ROH within populations for the mean number of ROH longer than 1.5Mb, mean  
 409 size of ROH longer than 1.5Mb, mean total sum of ROH longer than 1.5Mb and mean total length of ROH shorter than 1.5Mb. The  
 410 colors are coded according to the legends of Figures 1 and 2.

411 Differences between the short and long ROH seen in Figure 2 are represented more clearly in Figure 4.

412 Geographic classification and stratification can be seen for mean sum of ROH <1.5Mb: SSA populations

413 have the lowest medians (Figure S8), and within the continent, populations from the Horn of Africa have

414 a significant higher sum of ROH as shown in Figure S7. Figure 4 and Table 1 show that, without considering

415 Horn of Africa populations, there are no real differences between Khoe-San and the rest of the SSA

416 populations. In Table 1 populations like the Ju/'hoansi, with a mean total sum of ROH <1.5Mb (109.66

417 Mb), are slightly higher than populations from Western Africa, or populations like the !Xun, Nama or Khwe

418 with the smallest mean total sum of ROH<1.5Mb in all SSA (75.5, 73.9 and 62.9 Mb respectively) besides

419 the Colesberg Colored population with 69.7Mb. The shapes of the violin plots for sum of ROH <1.5Mb

420 provide additional information. In general, populations are homogeneous, with very short tails and an  
421 almost normal distribution; however, Khoe and San, Colored and populations from America present more  
422 variability. Distribution shapes are completely different for the sum of ROH >1.5Mb. When considering  
423 these ROH we observe greater variability of the distribution shapes across populations within and outside  
424 SSA. Wolof (median=12.5Mb, mean=27.1Mb, sd=40.9Mb), Fula (median=14.4Mb, mean=33.8Mb, sd=42.7  
425 Mb) and Somali (median=35.8Mb, mean=52.3Mb, sd=42.1Mb) show especially long right tails, and just  
426 two populations outside SSA: PEL (median=39.6Mb, mean=46.5Mb, sd=54.8Mb) and CLM  
427 (median=22.2Mb, mean=38.4Mb, sd=47.3Mb) have longer tails. Khoe-San populations form a  
428 heterogeneous group, but also show long tails and widely spread distributions, indeed two populations  
429 with the highest total sum of ROH are Khoe-San: the !Xun population from Angola (median=48.9Mb,  
430 mean=58.8Mb, sd=38.7Mb) and the Ju/'hoansi from Namibia (median=51.8Mb, mean=53.0Mb,  
431 sd=109.7Mb). Figures S7 and S8 show non-parametrical pairwise statistical comparisons between SSA  
432 populations and world regions.

433

#### 434 **Inbreeding Coefficient from ROH: $F_{ROH}$**

435 The genomic inbreeding coefficient from ROH was obtained as the total sum of ROH longer than 1.5Mb  
436 divided by the total length of the autosomal genome. For practical reasons a cut-off point of  $F_{ROH} = 0.0156$   
437 (corresponding to the mean kinship of a second cousin marriage) was set to differentiate between inbred  
438 and non-inbred individuals. In the demographic literature consanguineous marriage is usually defined as  
439 a union between individuals who are related as second cousin or closer. This arbitrary limit is based on  
440 the perception that an inbreeding coefficient below 0.0156 has biological effects not very different from  
441 those found in the general population <sup>47</sup>.

442

443



444 **Table 1.** Number, size distribution and sum of ROH (above and below 1.5Mb) across global regions and according to population.

| Population                         | N   | N ROH >1.5 |     | Mean Size ROH >1.5 |      | Total Sum ROH >1.5 |       | Total Sum ROH <1.5 |       |
|------------------------------------|-----|------------|-----|--------------------|------|--------------------|-------|--------------------|-------|
|                                    |     | Mean       | SD  | Mean               | SD   | Mean               | SD    | Mean               | SD    |
| <b>Western Africa</b>              |     |            |     |                    |      |                    |       |                    |       |
| Wolof                              | 78  | 5.84       | 4.6 | 3.549              | 2.58 | 27.065             | 40.92 | 104.90             | 9.74  |
| Fula                               | 74  | 8.41       | 7.5 | 3.296              | 2.37 | 33.838             | 42.75 | 105.09             | 13.76 |
| Mandinka                           | 88  | 3.72       | 2.5 | 3.521              | 2.78 | 15.119             | 19.34 | 100.44             | 7.30  |
| Jola                               | 79  | 6.37       | 2.5 | 2.837              | 1.20 | 18.866             | 12.47 | 107.98             | 6.82  |
| <b>Gulf of Guinea</b>              |     |            |     |                    |      |                    |       |                    |       |
| YRI                                | 100 | 3.85       | 2.1 | 2.398              | 1.05 | 9.553              | 7.47  | 99.01              | 7.59  |
| Ga_Adangbe                         | 100 | 3.78       | 2.2 | 2.821              | 1.46 | 11.878             | 12.13 | 97.55              | 7.80  |
| Igbo                               | 99  | 4.66       | 2.3 | 2.849              | 1.36 | 14.328             | 11.97 | 99.67              | 7.97  |
| <b>Mix. Afri-Amer</b>              |     |            |     |                    |      |                    |       |                    |       |
| ACB                                | 72  | 2.81       | 1.4 | 2.201              | 0.96 | 6.546              | 5.87  | 91.90              | 9.63  |
| ASW                                | 49  | 2.36       | 1.4 | 2.227              | 0.70 | 5.386              | 3.80  | 88.14              | 9.10  |
| <b>Horn of Africa</b>              |     |            |     |                    |      |                    |       |                    |       |
| Amhara                             | 42  | 3.61       | 1.8 | 2.074              | 0.43 | 7.547              | 4.06  | 137.00             | 9.36  |
| Oromo                              | 26  | 4.12       | 2.3 | 2.196              | 0.67 | 9.696              | 7.89  | 127.30             | 9.75  |
| Somali                             | 39  | 13.67      | 6.1 | 3.387              | 1.40 | 52.283             | 42.80 | 146.03             | 12.59 |
| <b>Eastern Africa Niger-Congo</b>  |     |            |     |                    |      |                    |       |                    |       |
| Baganda                            | 100 | 5.05       | 2.6 | 2.364              | 0.53 | 12.088             | 6.83  | 93.01              | 8.02  |
| Banyarwanda                        | 100 | 4.27       | 2.3 | 2.276              | 0.58 | 9.842              | 6.14  | 88.65              | 8.71  |
| Barundi                            | 97  | 4.10       | 1.8 | 2.413              | 1.24 | 9.879              | 6.58  | 86.60              | 8.43  |
| Kikuyu                             | 99  | 3.91       | 1.8 | 2.525              | 1.32 | 9.757              | 5.57  | 85.98              | 6.54  |
| LWK                                | 74  | 5.07       | 2.2 | 2.335              | 0.56 | 11.896             | 6.08  | 89.46              | 7.84  |
| <b>Eastern Africa Nilo-Saharan</b> |     |            |     |                    |      |                    |       |                    |       |
| Kalenjin                           | 100 | 4.28       | 2.1 | 2.532              | 0.77 | 11.379             | 7.87  | 95.27              | 9.11  |
| <b>Southern Africa</b>             |     |            |     |                    |      |                    |       |                    |       |
| Herero                             | 12  | 13.33      | 5.4 | 3.186              | 0.44 | 43.247             | 19.63 | 77.40              | 16.07 |
| Sotho                              | 86  | 6.70       | 2.9 | 2.470              | 0.53 | 16.748             | 8.84  | 84.83              | 7.92  |
| Zulu                               | 100 | 7.72       | 2.9 | 2.708              | 0.78 | 20.511             | 8.45  | 89.17              | 8.01  |
| <b>Africa Khoe and San</b>         |     |            |     |                    |      |                    |       |                    |       |
| Ju/'hoansi                         | 18  | 15.11      | 5.0 | 3.363              | 0.75 | 53.003             | 26.47 | 109.66             | 15.13 |
| !Xun                               | 19  | 13.63      | 5.9 | 4.078              | 1.32 | 58.856             | 38.66 | 75.59              | 12.70 |
| Gui//Gana                          | 15  | 11.27      | 4.3 | 3.497              | 1.18 | 42.849             | 32.28 | 87.22              | 25.72 |
| #Khomani                           | 39  | 6.77       | 4.8 | 2.957              | 1.04 | 22.217             | 22.63 | 84.08              | 18.92 |
| Nama                               | 20  | 8.25       | 5.5 | 2.941              | 0.78 | 25.922             | 21.38 | 73.91              | 24.63 |
| Khwe                               | 16  | 9.88       | 5.9 | 5.008              | 2.02 | 51.584             | 38.42 | 62.93              | 14.23 |
| Karretjie                          | 20  | 5.15       | 3.4 | 2.388              | 0.84 | 12.985             | 11.17 | 91.92              | 19.21 |
| <b>Africa Colored</b>              |     |            |     |                    |      |                    |       |                    |       |
| Wellington                         | 20  | 2.50       | 1.4 | 2.030              | 0.37 | 5.141              | 3.08  | 101.04             | 30.90 |
| Colesberg                          | 20  | 2.67       | 1.6 | 2.159              | 0.55 | 6.001              | 4.67  | 69.75              | 21.75 |
| <b>Europe</b>                      |     |            |     |                    |      |                    |       |                    |       |
| CEU                                | 95  | 6.34       | 2.3 | 2.020              | 0.37 | 12.778             | 4.88  | 259.12             | 12.36 |
| FIN                                | 97  | 10.53      | 3.9 | 2.390              | 0.38 | 25.489             | 10.78 | 267.43             | 12.27 |
| GBR                                | 91  | 6.90       | 2.8 | 2.309              | 0.98 | 16.549             | 12.41 | 263.46             | 13.06 |
| IBS                                | 99  | 6.80       | 3.3 | 2.514              | 1.20 | 18.089             | 14.96 | 253.15             | 14.65 |
| TSI                                | 92  | 5.28       | 2.4 | 2.471              | 1.76 | 12.939             | 8.96  | 250.29             | 11.04 |
| <b>Southern Asia</b>               |     |            |     |                    |      |                    |       |                    |       |
| GIH                                | 95  | 10.03      | 3.8 | 2.602              | 0.76 | 26.496             | 13.77 | 244.41             | 12.30 |
| <b>Eastern Asia</b>                |     |            |     |                    |      |                    |       |                    |       |
| CDX                                | 83  | 9.95       | 3.2 | 2.631              | 1.08 | 27.348             | 18.01 | 319.44             | 11.45 |
| CHB                                | 98  | 7.17       | 2.5 | 1.986              | 0.49 | 14.372             | 6.92  | 316.12             | 10.07 |
| CHS                                | 86  | 7.42       | 2.6 | 2.042              | 0.52 | 15.254             | 7.40  | 318.98             | 11.23 |
| KHV                                | 96  | 8.07       | 2.9 | 2.051              | 0.55 | 17.095             | 10.39 | 313.42             | 11.04 |
| JPT                                | 96  | 8.25       | 3.0 | 2.061              | 0.66 | 17.505             | 13.76 | 326.15             | 11.05 |
| <b>South America</b>               |     |            |     |                    |      |                    |       |                    |       |
| PEL                                | 50  | 17.90      | 6.7 | 2.375              | 1.20 | 46.542             | 54.82 | 378.33             | 64.76 |
| <b>Mix. Hisp-Amer</b>              |     |            |     |                    |      |                    |       |                    |       |
| CLM                                | 65  | 9.63       | 5.8 | 3.251              | 1.72 | 38.396             | 47.31 | 226.98             | 30.53 |
| PUR                                | 72  | 7.31       | 3.4 | 3.077              | 1.42 | 24.091             | 22.11 | 206.55             | 21.58 |
| MXL                                | 47  | 8.98       | 4.8 | 2.510              | 1.31 | 25.726             | 32.00 | 259.54             | 30.68 |

N: number of individuals.

N ROH>1.5: Number of ROH > 1.5 Mb.

SD: Standard Deviation.

Three letter population abbreviation are provided in the text.

445 **Table 2.** Summary statistics for the inbreeding coefficient calculated from ROH ( $F_{ROH}$ ) across global regions and according to  
 446 population.

| Population                         | Mean $F_{ROH}$ |       | Max $F_{ROH}$ | N 2 C | % 2 C | N 1 C |
|------------------------------------|----------------|-------|---------------|-------|-------|-------|
|                                    | Mean           | SD    |               |       |       |       |
| <b>Western Africa</b>              |                |       |               |       |       |       |
| Wolof                              | 0.0094         | 0.014 | 0.0696        | 14    | 17.9  | 2     |
| Fula                               | 0.0117         | 0.015 | 0.0612        | 22    | 29.7  | 0     |
| Mandinka                           | 0.0052         | 0.007 | 0.0321        | 7     | 8.0   | 0     |
| Jola                               | 0.0065         | 0.004 | 0.0287        | 6     | 7.6   | 0     |
| <b>Gulf of Guinea</b>              |                |       |               |       |       |       |
| YRI                                | 0.0033         | 0.003 | 0.0157        | 1     | 1.0   | 0     |
| Ga_Adangbe                         | 0.0041         | 0.004 | 0.0221        | 6     | 6.0   | 0     |
| Igbo                               | 0.0050         | 0.004 | 0.0248        | 7     | 7.1   | 0     |
| <b>Mix. Afri-Amer</b>              |                |       |               |       |       |       |
| ACB                                | 0.0023         | 0.002 | 0.0154        | 1     | 1.4   | 0     |
| ASW                                | 0.0019         | 0.001 | 0.0069        | 0     | 0.0   | 0     |
| <b>Horn of Africa</b>              |                |       |               |       |       |       |
| Amhara                             | 0.0026         | 0.001 | 0.0065        | 0     | 0.0   | 0     |
| Oromo                              | 0.0034         | 0.003 | 0.0124        | 0     | 0.0   | 0     |
| Somali                             | 0.0181         | 0.015 | 0.0597        | 19    | 48.7  | 0     |
| <b>Eastern Africa Niger-Congo</b>  |                |       |               |       |       |       |
| Baganda                            | 0.0042         | 0.002 | 0.0122        | 0     | 0.0   | 0     |
| Banyarwanda                        | 0.0034         | 0.002 | 0.0115        | 0     | 0.0   | 0     |
| Barundi                            | 0.0034         | 0.002 | 0.0181        | 1     | 1.0   | 0     |
| Kikuyu                             | 0.0034         | 0.002 | 0.0106        | 0     | 0.0   | 0     |
| LWK                                | 0.0041         | 0.002 | 0.0096        | 0     | 0.0   | 0     |
| <b>Eastern Africa Nilo-Saharan</b> |                |       |               |       |       |       |
| Kalenjin                           | 0.0039         | 0.003 | 0.0189        | 1     | 1.0   | 0     |
| <b>Southern Africa</b>             |                |       |               |       |       |       |
| Herero                             | 0.0150         | 0.007 | 0.0239        | 6     | 50.0  | 0     |
| Sotho                              | 0.0058         | 0.003 | 0.0214        | 2     | 2.3   | 0     |
| Zulu                               | 0.0071         | 0.003 | 0.0170        | 4     | 4.0   | 0     |
| <b>Africa Khoes and San</b>        |                |       |               |       |       |       |
| Ju/'hoansi                         | 0.0184         | 0.009 | 0.0384        | 7     | 38.9  | 0     |
| !Xun                               | 0.0204         | 0.013 | 0.0543        | 14    | 73.7  | 0     |
| Gui//Gana                          | 0.0151         | 0.011 | 0.0497        | 9     | 60.0  | 0     |
| ≠Khomani                           | 0.0077         | 0.008 | 0.0314        | 6     | 15.4  | 0     |
| Nama                               | 0.0090         | 0.007 | 0.0298        | 4     | 20.0  | 0     |
| Khwe                               | 0.0179         | 0.013 | 0.0502        | 10    | 62.5  | 0     |
| Karretjie                          | 0.0045         | 0.003 | 0.0384        | 7     | 38.9  | 0     |
| <b>Africa Colored</b>              |                |       |               |       |       |       |
| Wellington                         | 0.0011         | 0.001 | 0.0040        | 0     | 0.0   | 0     |
| Colesberg                          | 0.0021         | 0.002 | 0.0068        | 0     | 0.0   | 0     |
| <b>Europe</b>                      |                |       |               |       |       |       |
| CEU                                | 0.0044         | 0.002 | 0.0079        | 0     | 0.0   | 0     |
| FIN                                | 0.0088         | 0.004 | 0.0163        | 16    | 16.5  | 0     |
| GBR                                | 0.0057         | 0.004 | 0.0326        | 5     | 5.5   | 0     |
| IBS                                | 0.0063         | 0.005 | 0.0298        | 9     | 9.1   | 0     |
| TSI                                | 0.0045         | 0.003 | 0.0153        | 4     | 4.3   | 0     |
| <b>Southern Asia</b>               |                |       |               |       |       |       |
| GIH                                | 0.0092         | 0.005 | 0.0331        | 13    | 13.7  | 0     |
| <b>Eastern Asia</b>                |                |       |               |       |       |       |
| CDX                                | 0.0095         | 0.006 | 0.0396        | 17    | 20.5  | 0     |
| CHB                                | 0.0050         | 0.002 | 0.0161        | 2     | 2.0   | 0     |
| CHS                                | 0.0053         | 0.003 | 0.0199        | 2     | 2.3   | 0     |
| KHV                                | 0.0059         | 0.004 | 0.0289        | 4     | 4.2   | 0     |
| JPT                                | 0.0061         | 0.005 | 0.0481        | 1     | 1.0   | 0     |
| <b>South America</b>               |                |       |               |       |       |       |
| PEL                                | 0.0162         | 0.019 | 0.1400        | 28    | 56.0  | 1     |
| <b>Mix. Hisp-Amer</b>              |                |       |               |       |       |       |
| CLM                                | 0.0133         | 0.016 | 0.0756        | 18    | 27.7  | 3     |

|     |        |       |        |    |      |      |
|-----|--------|-------|--------|----|------|------|
| PUR | 0.0084 | 0.008 | 0.0573 | 14 | 19.4 | 4470 |
| MXL | 0.0089 | 0.011 | 0.0689 | 7  | 14.9 | 1    |

448 **N 2 C:** Number of individuals with a  $F_{ROH}$  higher than a second cousin union.  
449 **% 2 C:** Percentage of individuals in the population with an  $F_{ROH}$  higher than a second cousin union.  
450 **N 1 C:** Number of individuals with a  $F_{ROH}$  higher than a first cousin union.  
451 **SD:** Standard Deviation.  
452 Three letter population abbreviation are provided in the text.

453 Table 2 shows the mean  $F_{ROH}$ , the max  $F_{ROH}$ , the number and proportion (in %) of individuals with an  $F_{ROH}$   
454 between second ( $F=0.0156$ ) and first cousin ( $F=0.0625$ ), and the number of individuals with an  $F_{ROH}$  higher  
455 than first cousin per population. The highest average  $F_{ROH}$  for all populations can be found in the Khoe-  
456 San, !Xun and Ju/'hoansi people with an average  $F_{ROH}$  of 0.0204 and 0.0184 respectively showing them to  
457 be the most inbred populations. Besides these two, Somali people from the Horn of Africa, the Khwe Khoe  
458 and San, the PEL population and the Gui//Gana Khoe-San (average  $F_{ROH}=0.0181$ ; 0.0179; 0.0162 and  
459 0.0151 respectively) have mean  $F_{ROH}$  higher than a second cousin kinship. The individual with the highest  
460 inbreeding coefficient from ROH across all populations is a Peruvian with an  $F_{ROH}$  of 0.1400 (higher than  
461 an uncle-niece or double first cousin kinship,  $\theta=0.125$ ). Within SSA, only the Wolof from Western Africa  
462 has individuals with inbreeding coefficients higher than a first cousin union. Figure 5 plots the number of  
463 ROH (longer than 1.5Mb) and the total sum of ROH >1.5Mb for each SSA individual, and shows in red  
464 dashed lines conservative limits for second and first cousin inbreeding coefficient. In this figure it can be  
465 seen that, regarding  $F_{ROH}$ , populations across SSA have a wide range of inbreeding coefficient. In Western  
466 Africa (Figure 5A) Wolof and Fula individuals are more dispersed across the plot, with 17.9% of Wolof and  
467 29.7% of Fula having an  $F_{ROH}$  higher than 0.015. In contrast, Mandinka and Jola, with just 8% and 7.6% of  
468 inbred individuals, present a tighter scattering. Populations from the Gulf of Guinea and African-American  
469 admixed populations shown even tighter clustering with the ACB and ASW admixed populations being the  
470 tightest. These differences can also be seen in Eastern and Horn of Africa (Figure 5B), just the Somali  
471 people show a great dispersion, 48.7% of the sample have a  $F_{ROH}$  higher than 0.015. For Southern African  
472 populations it is possible to see the dispersion of the Khoe and San populations (Figure 5C). The 73.7%,



471 62.5% and 60.0% individuals of the !Xun, Khwe and Gui//Gana respectively have an  $F_{ROH}$  higher than a  
 472 second cousin union. These populations therefore have a large proportion of inbred individuals, even  
 473 more than the partially indigenous PEL population (56%); however due to the small population sample  
 474 sizes these numbers should be viewed with caution. At the opposite end of the spectrum, Colored  
 475 populations have a tight distribution with very low  $F_{ROH}$ .

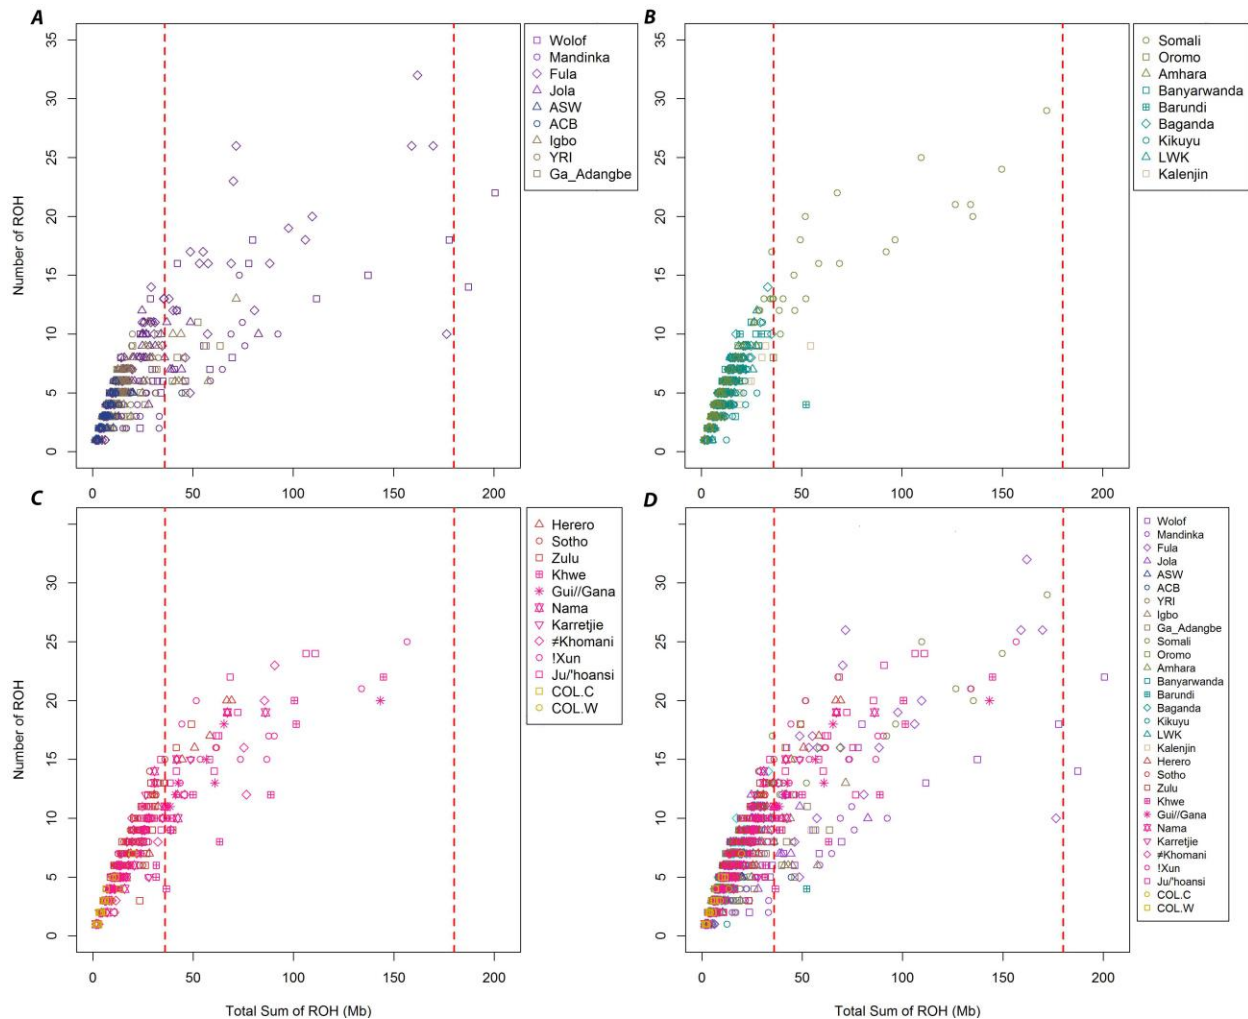

476  
 477 **Figure 5.** Each Sub-Sharan African individual is plotted according to their number of ROH and total sum of ROH. The perpendicular  
 478 broken red lines in all the plots at  $X=36$  and  $X=180$ , represent conservative thresholds for inbreeding coefficients of 0.0156 (second  
 479 cousin offspring) and 0.0625 (first cousin offspring). A. Individuals from Western Africa and the Gulf of Guinea. B. Populations  
 480 from Eastern Africa and the Horn of Africa. C. Populations from Southern Africa. D. All populations together. For color legend see  
 481 figure 1 (as above)

482

483

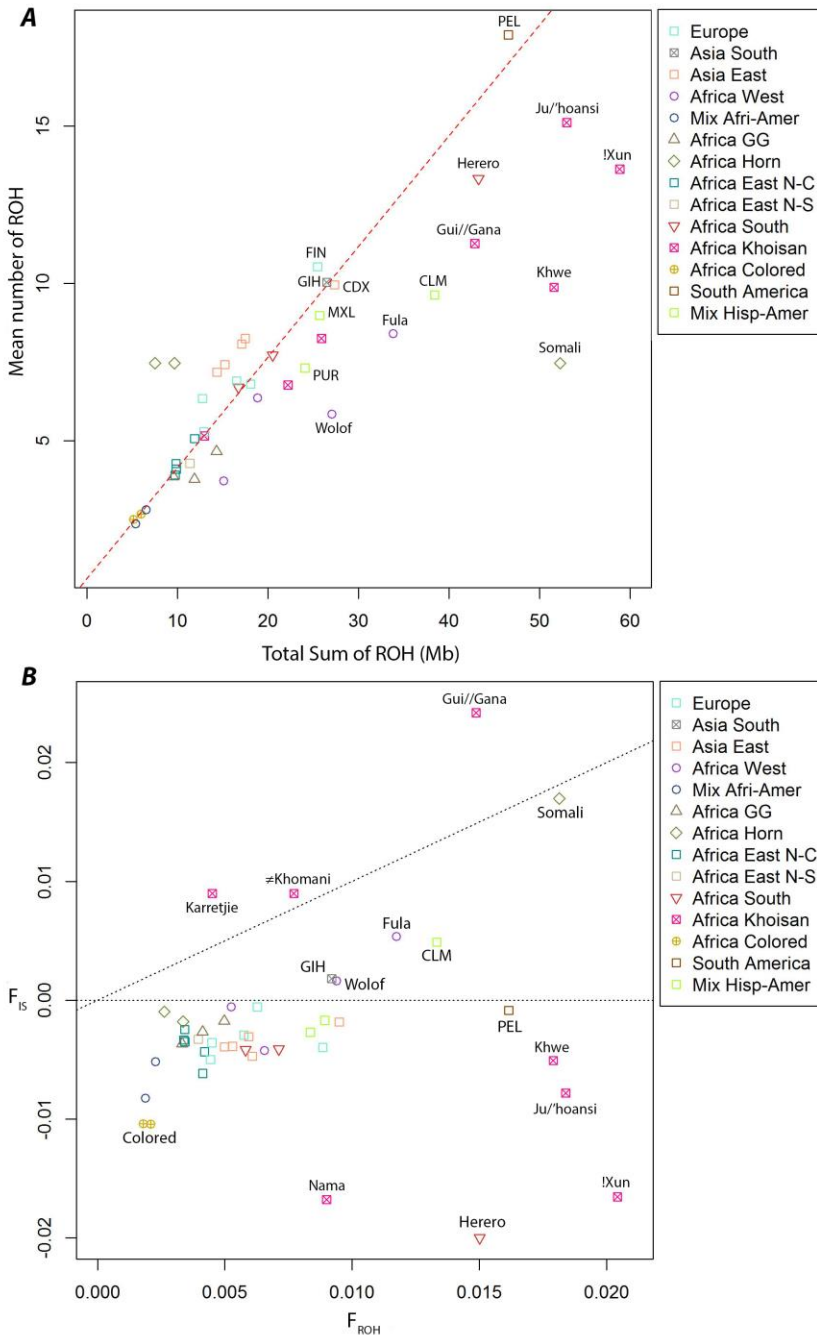

484

485 **Figure 6.** Population analysis and components of inbreeding coefficient. A. Mean number of ROH plotted versus mean total sum  
 486 of ROH in Mb for the 28 populations under study (symbols according to regional groupings). Red broke line represents the  
 487 regression line of the two variables (N of ROH vs Sum of ROH) for the South African Colored population (see Methods section) B.  
 488 Systematic inbreeding coefficient ( $F_{IS}$ ) versus the inbreeding coefficient obtained from ROH ( $F_{ROH}$ ). Diagonal broken line represents  
 489  $F_{IS} = F_{ROH}$ . Horizontal broken line represents  $F_{IS}=0$ .

490

491

492 **Discriminating between different sources of autozygosity: understanding population demographic**  
493 **history**

494 Like the inbreeding coefficient calculated from a deep pedigree,  $F_{ROH}$  denotes the total inbreeding  
495 coefficient, but it does not give information regarding how that autozygosity was generated. Was it the  
496 result of cultural practices favoring related unions, or because of a low effective population size and  
497 genetic drift?

498 In Figure 6A the mean number of ROH (>1.5Mb) is plotted against the mean total sum of ROH (>1.5Mb)  
499 by population. The diagonal (red dashed line) was obtained by regressing both variables of the Colored  
500 population as a non-consanguineous control group. Populations falling near this diagonal line, including  
501 most of the Europeans, Asians and Africans, carry a complement of ROH derived from their continental  
502 effective population size ( $N_e$ ). The number of ROH in these populations is driven mostly by numerous short  
503 to medium ROH sizes, but longer than 1.5Mb. Under this scenario, autozygosity provoked by genetic drift  
504 will generate a large number of ROH, but short in size. On the other hand, recent inbreeding loops will  
505 produce small numbers of very long ROH which will influence the sum of ROH much more than the total  
506 number of ROH. Populations like Somali, Khwe, !Xun and to a lesser degree Fula, Wolof or CLM, which  
507 display a right shift away from the trend line in the X-axis, suggest the practice of consanguineous unions.  
508 A different approach toward differentiating the two sources of inbreeding is shown in Figure 6B. In this  
509 figure the  $F_{IS}$  is plotted against the  $F_{ROH}$  for different populations. Three different regions can be  
510 considered in this plot delimited by the diagonal, where  $F_{IS}=F_{ROH}$ , and the horizontal line  $F_{IS}=0$ . Populations  
511 close to the diagonal line, like the Somali, have a strong component of systematic inbreeding or  $F_{IS}$ , which  
512 means that the total inbreeding coefficient,  $F_{IT}$ , of this population is mainly produced by a deviation from  
513 panmixia, in other words, consanguinity. Panmictic inbreeding, caused by genetic drift will be more  
514 relevant as the population gets close to the line  $F_{IS}=0$ . Low  $N_e$ , isolation and genetic drift become very  
515 relevant when populations have negative  $F_{IS}$ . Under this scenario of avoidance of consanguinity and excess

516 of heterozygotes (expected under H-W proportions), the total inbreeding coefficient of populations like  
 517 PEL, Khwe, Ju/'hoansi, !Xun or Herero will be provoked by genetic isolation and genetic drift: strong  $F_{ST}$ .

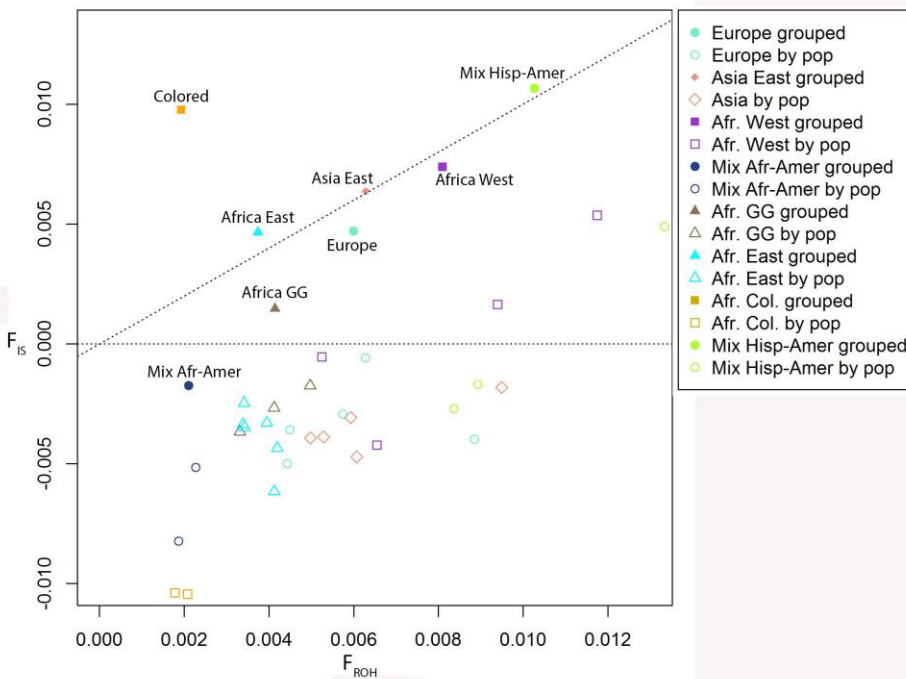

518  
 519 **Figure 7.** Representation of the Wahlund effect.  $F_{IS}$  and  $F_{ROH}$  values for the South African Colored population, Easter Africans,  
 520 Wester Africans, Gulf of Guinea populations, mixed African-Americans, Europeans, Eastern Asia and mixed Hispanic-Americans  
 521 were plotted (empty shapes). Mean  $F_{IS}$  and mean  $F_{ROH}$  per regional group are plotted and shown as solid shapes.

## 522 Detecting the Wahlund effect

523 As explained above, Figure 6B has three regions:  $F_{IS} < 0$ ,  $F_{IS} = F_{ROH}$  and  $F_{IS} > F_{ROH}$ . Under an inbreeding context,  
 524 and according to Wright F statistic, it does not make much sense for  $F_{IS}$  to be bigger than  $F_{IT}$ . So, if a  
 525 population presents with a larger  $F_{IS}$  other phenomena must be taken into account. Besides inbreeding,  
 526 natural selection pressure and Wahlund effect can increase  $F_{IS}$ ; nevertheless, natural selection is an  
 527 evolutionary force that can change  $F_{IS}$  locally in specific genome regions, but never at a whole genome  
 528 level. The only explanation is the Wahlund effect: a deficiency of heterozygotes and excess of  
 529 homozygotes provoked when subpopulations with different allele frequencies are lumped together<sup>48</sup>. This  
 530 effect is shown in Figure 7. In this figure  $F_{IS}$  and  $F_{ROH}$  were obtained for each population and grouped by  
 531 region. A perfect example is the Colored populations: when both populations are considered separately

532 their  $F_{IS}$  is negative (-0.01 for both of them) but when combined the resulting  $F_{IS}$  is positive (+0.01). This  
533 phenomenon can be seen for the other populations and regional groups in Figure 7. When combined in  
534 their respective regional groups the resultant  $F_{ROH}$  is equal to the average of all the populations; however,  
535 the  $F_{IS}$  increases depending on the allele proportion differences between populations of a same regional  
536 group. According to this explanation, the Karretjie, ≠Khonami and Gui//Gana populations in Figure 6B may  
537 indeed be the mixture of at least two different subpopulations with different alleles frequencies.

### 538 **Genomic distribution of Runs of Homozygosity**

539 ROH are not randomly distributed across the genome and there are regions with a high prevalence of ROH  
540 or complete absence<sup>7; 19; 20</sup>. ROH islands, genomic regions with high prevalence of ROH, or regions of  
541 heterozygosity (RHZ) are analyzed by collapsing populations into their regional groups: from SSA: West,  
542 Gulf of Guinea, East, Horn of Africa, Southern Bantu and Khoe-San. From out of SSA: Europe, Eastern Asia,  
543 Hispanic-American admixed and African-American admixed. In Figure 8, ROHi and RHZ are represented  
544 for the 22 autosomal chromosomes of the Khoe and San and European groups.

545 Within SSA, the region of the Horn of Africa has the shortest (measured in Mb and cM) but a larger number  
546 of ROHi (544) (Table 3). The Khoe and San is the group with the smallest number of ROHi, less than half  
547 (220) are of an average size. Eastern Africa has the longest ROHi measured in Mb, when measured in cM  
548 there are no big differences across SSA. Outside SSA, the Europeans form a group with the highest number  
549 of ROHi (795), 3.6 times more than the Khoe and San. Also, Europe is the group with the larger ROHi,  
550 measured in Mb and cM, with 90 ROHi larger than 1 Mb. Interestingly the African-American admixed  
551 group has almost no ROH longer than 1.5Mb, but is the group with the second highest number of ROHi.  
552 Surprisingly this group has longer ROHi with a mean size of 0.615 Mb or 0.25 cM, higher than most groups.  
553 Being the regional group from SSA with the largest number of ROHi, it seems reasonable that the Horn of  
554 Africa is the group with the least number of regions of heterozygosity, defined as regions with  $\leq 5\%$   
555 homozygosity (RHZ 5%). Surprisingly, this is not the case for RHZ where no individual is in homozygosity

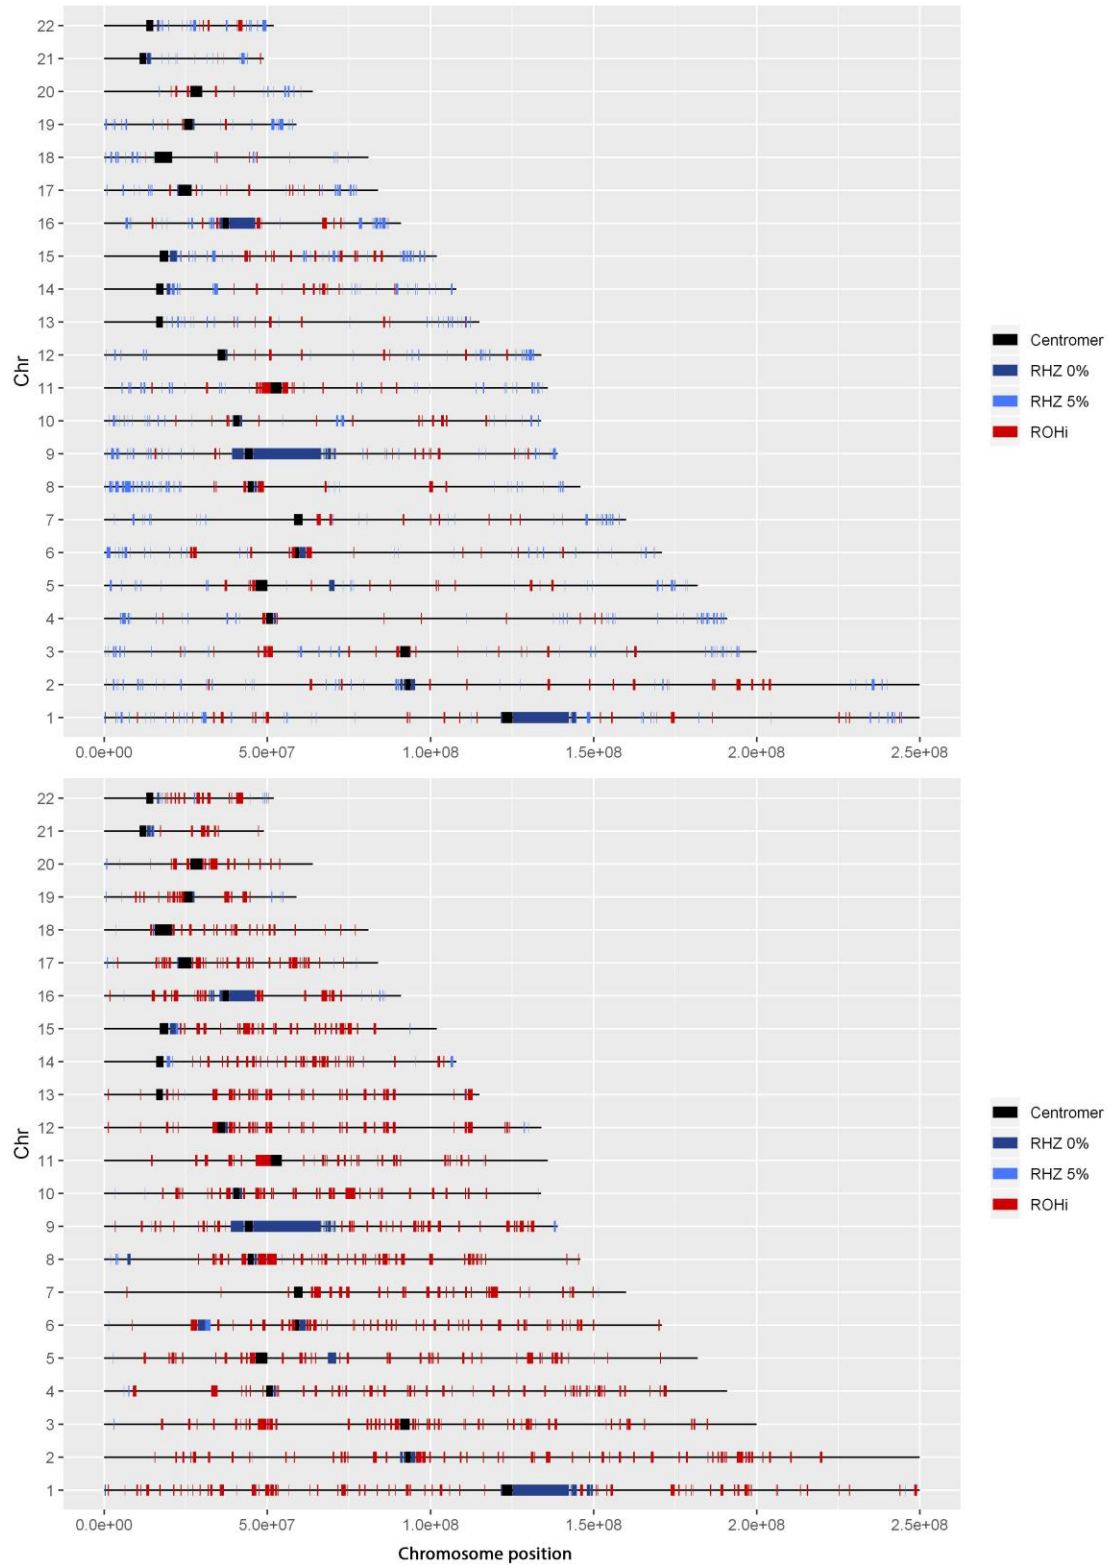

560 **Table 3.** Summary statistics for the ROH islands (ROHi) and the regions of heterozygosity (RHZ) for populations combined from  
 561 different geographic regions.

| Population          | N    | Number by size |           |           |         | Mean length (Mb) |       | Mean length (cM) |      | Max length |       | Mean Number of SNP |       |
|---------------------|------|----------------|-----------|-----------|---------|------------------|-------|------------------|------|------------|-------|--------------------|-------|
|                     |      | > 1.0 Mb       | 1.0 - 0.5 | 0.5 - 0.3 | <0.3 Mb | Mean             | SD    | Mean             | SD   | Mb         | cM    | Mean               | SD    |
|                     |      |                |           |           |         |                  |       |                  |      |            |       |                    |       |
| Africa West         |      |                |           |           |         |                  |       |                  |      |            |       |                    |       |
| ROHi                | 383  | 35             | 128       | 126       | 94      | 0.599            | 0.37  | 0.187            | 0.34 | 4.2        | 3.24  | 181.7              | 110.4 |
| RHZ 0%              | 48   | 14             | 12        | 4         | 18      | 0.663            | 0.62  | 1.245            | 3.32 | 2.4        | 11.74 | 227.8              | 258.5 |
| RHZ 5%              | 926  | 21             | 81        | 181       | 643     | 0.235            | 0.25  | 0.421            | 0.91 | 4.0        | 13.81 | 98.7               | 105.5 |
| Africa GG           |      |                |           |           |         |                  |       |                  |      |            |       |                    |       |
| ROHi                | 370  | 40             | 117       | 138       | 75      | 0.614            | 0.41  | 0.204            | 0.40 | 4.2        | 3.77  | 184.0              | 122.5 |
| RHZ 0%              | 57   | 11             | 12        | 14        | 20      | 0.691            | 0.73  | 0.742            | 1.88 | 3.6        | 7.16  | 286.8              | 301.1 |
| RHZ 5%              | 1295 | 21             | 130       | 258       | 886     | 0.259            | 0.31  | 0.467            | 0.95 | 4.1        | 13.81 | 107.3              | 126.1 |
| Africa Horn         |      |                |           |           |         |                  |       |                  |      |            |       |                    |       |
| ROHi                | 544  | 18             | 74        | 126       | 326     | 0.374            | 0.24  | 0.106            | 0.26 | 1.6        | 3.230 | 114.4              | 75.3  |
| RHZ 0%              | 70   | 14             | 13        | 12        | 20      | 0.492            | 0.597 | 0.511            | 1.99 | 2.6        | 11.74 | 205.1              | 248.7 |
| RHZ 5%              | 751  | 17             | 53        | 143       | 538     | 0.222            | 0.250 | 0.357            | 0.87 | 4          | 13.81 | 92.4               | 104.3 |
| Africa East         |      |                |           |           |         |                  |       |                  |      |            |       |                    |       |
| ROHi                | 371  | 47             | 134       | 134       | 56      | 0.647            | 0.37  | 0.209            | 0.39 | 3.3        | 3.779 | 210.0              | 120.5 |
| RHZ 0%              | 57   | 11             | 13        | 15        | 18      | 0.731            | 0.740 | 0.885            | 2.01 | 3.6        | 7.16  | 298.8              | 300.5 |
| RHZ 5%              | 1596 | 37             | 169       | 339       | 1051    | 0.279            | 0.336 | 0.526            | 1.12 | 4.0        | 14.24 | 114.2              | 137.4 |
| Africa South        |      |                |           |           |         |                  |       |                  |      |            |       |                    |       |
| ROHi                | 294  | 22             | 94        | 110       | 68      | 0.581            | 0.36  | 0.168            | 0.35 | 3.4        | 3.244 | 213.5              | 130.3 |
| RHZ 0%              | 53   | 12             | 12        | 13        | 16      | 0.532            | 0.551 | 0.762            | 2.67 | 2.3        | 11.74 | 214.9              | 222.5 |
| RHZ 5%              | 1300 | 32             | 152       | 342       | 774     | 0.261            | 0.261 | 0.467            | 0.95 | 2.6        | 13.81 | 105.5              | 105.3 |
| Africa Khoe and San |      |                |           |           |         |                  |       |                  |      |            |       |                    |       |
| ROHi                | 220  | 19             | 61        | 79        | 61      | 0.565            | 0.37  | 0.099            | 0.19 | 3.3        | 2.622 | 210.6              | 137.1 |
| RHZ 0%              | 49   | 9              | 12        | 10        | 18      | 0.650            | 0.69  | 1.105            | 3.22 | 3.6        | 11.30 | 262.3              | 281.6 |
| RHZ 5%              | 1253 | 24             | 99        | 216       | 914     | 0.237            | 0.26  | 0.387            | 0.83 | 3.7        | 11.74 | 96.0               | 103.9 |
| Mix. Af-Amer        |      |                |           |           |         |                  |       |                  |      |            |       |                    |       |
| ROHi                | 689  | 72             | 221       | 252       | 144     | 0.615            | 0.41  | 0.251            | 0.34 | 5.1        | 4.233 | 146.1              | 98.6  |
| RHZ 0%              | 194  | 11             | 14        | 25        | 144     | 0.294            | 0.48  | 0.270            | 1.22 | 3.6        | 13.81 | 120.9              | 196.1 |
| RHZ 5%              | 1859 | 39             | 217       | 404       | 1199    | 0.284            | 0.33  | 0.511            | 1.04 | 4.6        | 14.71 | 116.5              | 134.0 |
| Europe              |      |                |           |           |         |                  |       |                  |      |            |       |                    |       |
| ROHi                | 795  | 90             | 211       | 286       | 208     | 0.604            | 0.43  | 0.254            | 0.36 | 5.3        | 4.232 | 122.9              | 88.4  |
| RHZ 0%              | 58   | 11             | 16        | 14        | 17      | 0.739            | 0.76  | 0.902            | 1.81 | 4.0        | 7.81  | 312.8              | 322.1 |
| RHZ 5%              | 218  | 12             | 21        | 33        | 152     | 0.325            | 0.54  | 0.412            | 1.22 | 4.1        | 13.81 | 137.8              | 227.2 |
| Asia. East          |      |                |           |           |         |                  |       |                  |      |            |       |                    |       |
| ROHi                | 459  | 26             | 85        | 139       | 209     | 0.466            | 0.34  | 0.128            | 0.31 | 4.1        | 3.498 | 118.8              | 87.6  |
| RHZ 0%              | 57   | 11             | 15        | 14        | 17      | 0.751            | 0.78  | 1.229            | 3.07 | 4          | 11.74 | 313.5              | 328.9 |
| RHZ 5%              | 195  | 14             | 16        | 33        | 132     | 0.373            | 0.62  | 0.388            | 1.13 | 4.1        | 11.75 | 155.9              | 261.1 |
| Mix. Hisp-Amer      |      |                |           |           |         |                  |       |                  |      |            |       |                    |       |
| ROHi                | 645  | 56             | 171       | 205       | 213     | 0.561            | 0.40  | 0.202            | 0.34 | 5.3        | 4.232 | 144.9              | 104.6 |
| RHZ 0%              | 59   | 11             | 16        | 14        | 18      | 0.726            | 0.76  | 0.846            | 1.77 | 4          | 7.16  | 302.4              | 316   |
| RHZ 5%              | 273  | 12             | 22        | 48        | 191     | 0.304            | 0.49  | 0.403            | 1.10 | 4.1        | 13.81 | 126.6              | 203   |

562 N: number of ROHi and RHZ.

Mb: Megabases

563 cM: Centimorgans

SD: Standard Deviation.

564

565



566 **Table 4.** Location, length, percentage of individuals with ROH for the ROH island and protein coding genes of the five most  
 567 prevalent ROH islands in the Sub-Saharan African regional groups.

|                   | Chr. | Pos 1    | Pos 2    | Length (Mb) | % Indv | Protein coding genes                                                                                                                                             |
|-------------------|------|----------|----------|-------------|--------|------------------------------------------------------------------------------------------------------------------------------------------------------------------|
| <b>Africa W.</b>  |      |          |          |             |        |                                                                                                                                                                  |
|                   | 7    | 649E+05  | 664E+05  | 1.6         | 32.97  | <u>ZNF</u> , <u>ASL</u> , <u>CRCP</u> , <u>ERV3-1</u> , <u>GUSB</u> , <u>TPST1</u> , <u>VKORC1L1</u>                                                             |
|                   | 17   | 454E+05  | 458E+05  | 0.5         | 31.16  | <u>ARHGAP27</u> , <u>CRHR1</u> , <u>PLEKHM1</u>                                                                                                                  |
|                   | 9    | 951E+05  | 956E+05  | 0.6         | 28.58  | <u>FANCC</u> , <u>PTCH1</u>                                                                                                                                      |
|                   | 1    | 1140E+05 | 1144E+05 | 0.5         | 26.39  | <u>OLFML3</u> , <u>SYT6</u> , <u>TRIM33</u>                                                                                                                      |
|                   | 4    | 1070E+05 | 1073E+05 | 0.4         | 21.93  | <u>DKK2</u>                                                                                                                                                      |
| <b>Africa GG.</b> |      |          |          |             |        |                                                                                                                                                                  |
|                   | 9    | 951E+05  | 956E+05  | 0.6         | 29.26  | <u>FANCC</u> , <u>PTCH1</u>                                                                                                                                      |
|                   | 7    | 644E+05  | 664E+05  | 2.1         | 27.58  | <u>ZNF680</u>                                                                                                                                                    |
|                   | 11   | 100E+05  | 103E+05  | 0.4         | 26.92  | <u>SBF2</u>                                                                                                                                                      |
|                   | 16   | 146E+05  | 155E+05  | 1           | 26.62  | <u>PARN</u> , <u>BFAR</u> , <u>NPIPA</u> , <u>NTAN</u> , <u>PDXDC1</u> , <u>NOMO1</u> , <u>MPV17L</u> , <u>PLA2G10</u> , <u>RRN3</u>                             |
|                   | 17   | 455E+05  | 458E+05  | 0.4         | 26.51  | <u>CRHR1</u>                                                                                                                                                     |
| <b>Africa E.</b>  |      |          |          |             |        |                                                                                                                                                                  |
|                   | 16   | 183E+05  | 189E+05  | 0.7         | 28.27  | <u>NPIPA8</u> , <u>NOMO2</u> , <u>RPS15A</u> , <u>SMG1</u> , <u>ARL6IP1</u>                                                                                      |
|                   | 7    | 644E+05  | 664E+05  | 2.1         | 24.62  | <u>ZNF680</u>                                                                                                                                                    |
|                   | 14   | 668E+05  | 678E+05  | 1.1         | 22.22  | <u>GPHN</u> , <u>ATP6V1D</u> , <u>EIF2S1</u> , <u>MPP5</u> , <u>PIGH</u> , <u>PLEK</u> , <u>RDH</u> , <u>TMEM229B</u> , <u>VTI1B</u> , <u>ARG2</u>               |
|                   | 1    | 1140E+05 | 1144E+05 | 0.5         | 22.04  | <u>OLFML3</u> , <u>SYT6</u> , <u>TRIM33</u>                                                                                                                      |
|                   | 4    | 1070E+05 | 1073E+05 | 0.4         | 21.93  | <u>DKK2</u>                                                                                                                                                      |
| <b>Africa H.</b>  |      |          |          |             |        |                                                                                                                                                                  |
|                   | 2    | 1359E+05 | 1367E+05 | 0.9         | 36.24  | <u>DARS</u> , <u>CXCR4</u>                                                                                                                                       |
|                   | 8    | 676E+05  | 683E+05  | 0.8         | 35.63  | <u>CPA6</u> , <u>PREX2</u>                                                                                                                                       |
|                   | 1    | 525E+05  | 530E+05  | 0.6         | 33.96  | <u>ZCCHC11</u> , <u>COA7</u> , <u>ECHDC2</u> , <u>GPX7</u> , <u>SCP2</u> , <u>SHISAL2A</u> , <u>ZYG</u>                                                          |
|                   | 11   | 669E+05  | 674E+05  | 0.6         | 33.33  | <u>PC</u> , <u>ANKRD13D</u> , <u>CLCF1</u> , <u>GRK2</u> , <u>KDM2A</u> , <u>POLD4</u> , <u>PPP1CA</u> , <u>RAD9A</u> , <u>RHOD</u> , <u>SSH3</u> , <u>SYT12</u> |
|                   | 7    | 651E+05  | 660E+05  | 0.9         | 32.11  | <u>ZNF680</u> , <u>ASL</u> , <u>CRCP</u> , <u>GUSB</u> , <u>TPST1</u> , <u>VKORC1L1</u> , <u>ZNF92</u>                                                           |
| <b>Africa S.</b>  |      |          |          |             |        |                                                                                                                                                                  |
|                   | 7    | 650E+05  | 664E+05  | 1.5         | 26.46  | <u>ZNF680</u> , <u>ASL</u> , <u>CRCP</u> , <u>GUSB</u> , <u>TPST1</u> , <u>VKORC1L1</u> , <u>ZNF92</u>                                                           |
|                   | 17   | 454E+05  | 458E+05  | 0.5         | 22.10  | <u>ARHGAP27</u> , <u>CRHR1</u> , <u>PLEKHM1</u>                                                                                                                  |
|                   | 13   | 577E+05  | 582E+05  | 0.6         | 21.46  | <u>PCDH17</u>                                                                                                                                                    |
|                   | 3    | 507E+05  | 518E+05  | 1.2         | 20.66  | <u>DOCK3</u> , <u>MANF</u> , <u>RBM15B</u> , <u>DCAF1</u> , <u>DOCK3</u> , <u>GRM2</u> , <u>IQCF6</u> , <u>RAD54L2</u> , <u>TEX264</u>                           |
|                   | 15   | 444E+05  | 449E+05  | 0.6         | 20.12  | <u>CASC4</u> , <u>B2M</u> , <u>CTDSPL2</u> , <u>EIF3J</u> , <u>PATL2</u> , <u>SPG11</u> , <u>TRIM69</u>                                                          |
| <b>Africa KS.</b> |      |          |          |             |        |                                                                                                                                                                  |
|                   | 3    | 750E+05  | 753E+05  | 0.4         | 28.04  |                                                                                                                                                                  |
|                   | 2    | 1983E+05 | 1989E+05 | 0.7         | 26.06  | <u>PLCL1</u>                                                                                                                                                     |
|                   | 4    | 528E+05  | 531E+05  | 0.4         | 22.64  | <u>RASL11B</u> , <u>SCFD2</u>                                                                                                                                    |
|                   | 5    | 1371E+05 | 1378E+05 | 0.8         | 22.64  | <u>SPOCK1</u> , <u>HNRNPAO</u> , <u>KLHL3</u>                                                                                                                    |
|                   | 12   | 604E+05  | 608E+05  | 0.5         | 21.89  |                                                                                                                                                                  |

568 **Chr:** Chromosome.  
 569 **Pos 1:** Position where the ROHi starts.  
 570 **Pos 2:** Position where the ROHi finish.  
**%Ind:** Percentage of individuals in the population that share the ROHi.  
 Genes underlined have been previously reported to be under positive selection.



571 **Table 5.** Location, length, percentage of individuals with ROH for the ROH island and protein coding genes of the five most  
572 prevalence ROH islands in the non-African regional groups.

|                 | Chr | Pos 1    | Pos 2    | Length (Mb) | % Indv | Protein coding genes                                                                                                                                                           |
|-----------------|-----|----------|----------|-------------|--------|--------------------------------------------------------------------------------------------------------------------------------------------------------------------------------|
| <b>Mix A.A.</b> |     |          |          |             |        |                                                                                                                                                                                |
|                 | 7   | 649E+05  | 664E+05  | 1.6         | 33.83  | <i>ZNF, ASL, CRCP, ERV3-1, GUSB, TPST1, VKORC1L1,</i>                                                                                                                          |
|                 | 17  | 455E+05  | 458E+05  | 0.4         | 30.58  | <i>CRHR1</i>                                                                                                                                                                   |
|                 | 19  | 215E+05  | 217E+05  | 0.3         | 27.55  | <i>ZNF429</i>                                                                                                                                                                  |
|                 | 9   | 951E+05  | 957E+05  | 0.7         | 26.92  | <i>FANCC, PTCH1,</i>                                                                                                                                                           |
|                 | 1   | 1141E+05 | 1144E+05 | 0.4         | 26.24  | <i>TRIM33, SYT6</i>                                                                                                                                                            |
| <b>Europe</b>   |     |          |          |             |        |                                                                                                                                                                                |
|                 | 1   | 355E+05  | 367E+05  | 1.3         | 56.25  | <i>KIAA0319L, CLSPN, COL8A2, CSF3R, EVA1B, LSM10, MAP7D1, MRPS15, NCDN, OSCP1, PSMB2, SH3D21, STK40, TEKT2, TFAPEE, THRAP3, TRAPPC3</i>                                        |
|                 | 2   | 746E+05  | 749E+05  | 0.4         | 56.07  | <i>M1AP, HK2, SEMA4F</i>                                                                                                                                                       |
|                 | 15  | 283E+05  | 294E+05  | 1.2         | 51.44  | <i>HERC2, APBA2, FAM189A1, GOLGA, MSMCE3</i>                                                                                                                                   |
|                 | 3   | 1107E+05 | 1109E+05 | 0.3         | 50.98  |                                                                                                                                                                                |
|                 | 2   | 725E+05  | 731E+05  | 0.7         | 49.82  | <i>EXOC6B, EMX1, RAB11FIP5, SFXN5, SPR</i>                                                                                                                                     |
| <b>Asia E</b>   |     |          |          |             |        |                                                                                                                                                                                |
|                 | 17  | 611E+05  | 615E+05  | 0.5         | 70.50  | <i>BCAS3, TBX2, TBX4</i>                                                                                                                                                       |
|                 | 2   | 1089E+05 | 1096E+05 | 0.8         | 61.66  | <i>EDAR, SH3RF3, SEPT10</i>                                                                                                                                                    |
|                 | 3   | 443E+05  | 451E+05  | 0.9         | 58.70  | <i>TOPAZ1, TCAIM, CDCP1, CLEC3B, EXOSC7, KIAA1143, KIF15, TGM4, TMEM42, ZDHHC3, ZKSCAN7, ZNF</i>                                                                               |
|                 | 15  | 305E+05  | 314E+05  | 1           | 56.25  | <i>GOLGA8Q, GOLGA8H, FAN1, ARHGAP11B, KLF13, MTMR10, TRPM1</i>                                                                                                                 |
|                 | 5   | 1082E+05 | 1085E+05 | 0.4         | 55.23  | <i>FBXL17</i>                                                                                                                                                                  |
| <b>Mix H.A.</b> |     |          |          |             |        |                                                                                                                                                                                |
|                 | 17  | 577E+05  | 593E+05  | 1.7         | 46.80  | <i>CCDC182, MRPS32, CUEDC1, DYNLL2, EPX, GDPD1, HSF5, LPO, MKS1, MPO, MRPS23, MTMR4, OR4D, PPM1E, PRR11, RAD51C, RNF43, SKA2, SMG8, SUPT4H1, TEX14, TRIM37, TSPOAP1, VEZF1</i> |
|                 | 4   | 420E+05  | 421E+05  | 0.2         | 45.92  | <i>SLC30A9</i>                                                                                                                                                                 |
|                 | 3   | 1107E+05 | 1109E+05 | 0.3         | 45.83  |                                                                                                                                                                                |
|                 | 2   | 725E+05  | 731E+05  | 0.7         | 45.03  | <i>EXOC6B, ENX1, RAB11FIP5, SFXN5, SPR</i>                                                                                                                                     |
|                 | 15  | 285E+05  | 293E+05  | 0.9         | 44.38  | <i>GOLGA8G, APBA2, FAM189A1, MSMCE3</i>                                                                                                                                        |

573

**Chr:** Chromosome.

**Pos 1:** Position where the ROHi starts.

574

**Pos 2:** Position where the ROHi finish.

**%Ind:** Percentage of individuals in the population that share the ROHi

575

Genes underlined have been previously reported to be under positive selection.

576

577

578

579 **Table 6.** Location, length, percentage of individuals with ROH for the ROH island and protein coding genes of the three longest  
580 RHZ according to populations from global geographic regions

|                   | Chr | Pos 1    | Pos 2    | Length (Mb) | % Ind in ROH | Protein coding genes                                                                                                                |
|-------------------|-----|----------|----------|-------------|--------------|-------------------------------------------------------------------------------------------------------------------------------------|
| <b>Africa W.</b>  |     |          |          |             |              |                                                                                                                                     |
|                   | 6   | 287E+05  | 326E+05  | 4           | 1.5          | + 140 genes                                                                                                                         |
|                   | 5   | 686E+05  | 711E+05  | 2.6         | 0.24         | <i>SLC30A5, ANP32A, CORO2B, GLCE, KIF23, LARP6, NOX5, PAQR5, RPLP1, TLE3, UAUCA, SPESP1, THAP10, THSD4</i>                          |
|                   | 16  | 844E+05  | 869E+05  | 2.6         | 2.3          | <i>FOX11, FOXC2, COTL1, COX411, CRISPLD2, EMC8, FAM92B, FOX, GINS2, GSE1, IRF8, KIAA0513, KLHL36, MTHFSD, TDLC1, USP10, AZDHHC7</i> |
| <b>Africa GG.</b> |     |          |          |             |              |                                                                                                                                     |
|                   | 6   | 287E+05  | 326E+05  | 4           | 0.35         | + 140 genes                                                                                                                         |
|                   | 12  | 1286E+05 | 1312E+05 | 2.7         | 2.8          | <i>ADGRD1, FZD10, GLT1D1, PIWIL1, RAN, RIMBP2, STX2, TMEM, SLC15A5</i>                                                              |
|                   | 5   | 686E+05  | 711E+05  | 2.6         | 0            | See Africa W. Second RHZ                                                                                                            |
| <b>Africa E.</b>  |     |          |          |             |              |                                                                                                                                     |
|                   | 6   | 287E+05  | 326E+05  | 4           | 0.51         | + 140 genes                                                                                                                         |
|                   | 9   | 393E+05  | 428E+05  | 3.6         | 0            | <i>SPATA31A1, FOXD4L6, CBWD6, ANKRD20A2, CNTNAP3B</i>                                                                               |
|                   | 12  | 1278E+05 | 1312E+05 | 3.5         | 2.1          | See Africa GG. Second RHZ                                                                                                           |
| <b>Africa H.</b>  |     |          |          |             |              |                                                                                                                                     |
|                   | 6   | 287E+05  | 326E+05  | 4           | 0.42         | + 140 genes                                                                                                                         |
|                   | 12  | 1286E+05 | 1312E+05 | 2.7         | 2.8          | See Africa GG. Second RHZ                                                                                                           |
|                   | 5   | 686E+05  | 711E+05  | 2.6         | 0            | See Africa W. Second RHZ                                                                                                            |
| <b>Africa S.</b>  |     |          |          |             |              |                                                                                                                                     |
|                   | 6   | 287E+05  | 326E+05  | 4           | 0.54         | + 140 genes                                                                                                                         |
|                   | 9   | 388E+05  | 428E+05  | 4.1         | 0.2          | See Africa E. Second RHZ                                                                                                            |
|                   | 16  | 844E+05  | 869E+05  | 2.6         | 2.3          | See Africa W. Third RHZ                                                                                                             |
| <b>Africa KS.</b> |     |          |          |             |              |                                                                                                                                     |
|                   | 9   | 392E+05  | 428E+05  | 3.7         | 0.2          | See Africa E. Second RHZ                                                                                                            |
|                   | 8   | 64E+05   | 81E+05   | 1.8         | 3.3          | + 30 genes                                                                                                                          |
|                   | 5   | 69E+06   | 706E+05  | 1.7         | 0            | See Africa W. Second RHZ                                                                                                            |
| <b>Mix A.A.</b>   |     |          |          |             |              |                                                                                                                                     |
|                   | 6   | 287E+05  | 326E+05  | 4           | 0.4          | + 140 genes                                                                                                                         |
|                   | 12  | 1278E+05 | 1312E+05 | 3.5         | 1.3          | See Africa GG. Second RHZ                                                                                                           |
|                   | 16  | 843E+05  | 873E+05  | 3.1         | 1.4          | See Africa W. Third RHZ                                                                                                             |
| <b>Europe</b>     |     |          |          |             |              |                                                                                                                                     |
|                   | 9   | 388E+05  | 428E+05  | 4.1         | 0.03         | See Africa E. Second RHZ                                                                                                            |
|                   | 6   | 287E+05  | 326E+05  | 4           | 0.68         | + 140 genes                                                                                                                         |
|                   | 15  | 202+E05  | 227+E05  | 2.6         | 0.35         | <i>GOLGA, OR4M2, OR4N4, POTE2, POTE3, LINC02203</i>                                                                                 |
| <b>Asia E</b>     |     |          |          |             |              |                                                                                                                                     |
|                   | 9   | 388E+05  | 428E+05  | 4.1         | 0.03         | See Africa E. Second RHZ                                                                                                            |
|                   | 6   | 287E+05  | 325E+05  | 3.9         | 0.42         | + 140 genes                                                                                                                         |
|                   | 18  | 155+E05  | 185+E05  | 3.1         | 3.9          |                                                                                                                                     |
| <b>Mix H.A.</b>   |     |          |          |             |              |                                                                                                                                     |
|                   | 9   | 388E+05  | 428E+05  | 4.1         | 0.02         | See Africa E. Second RHZ                                                                                                            |
|                   | 6   | 287E+05  | 326E+05  | 4.0         | 0.3          | + 140 genes                                                                                                                         |
|                   | 15  | 202+E05  | 227+E05  | 2.6         | 1.2          | See Europe. Third RHZ                                                                                                               |

581

582

583

584

585 The Horn of Africa actually has more of these regions than the rest of SSA groups, and only the admixed  
586 group of the African-Americans has more RHZ 0% (Table 3). Table 3 shows that for every group there are  
587 big differences between the number of RHZ 0% and 5%. These differences can be explained mainly by a  
588 drastic increase of short RHZ 5% regions (< 0.3Mb) with the outcome of a reduction in the mean length  
589 (Mb and cM) of the RHZ 5% in comparison to RHZ 0%. Table 3 also shows bigger differences between  
590 regional groups when considering RHZ in comparison to ROHi, especially in number by size and mean  
591 length. In order to appreciate differences between regional groups, three extremely long RHZ 0%, shared  
592 by all groups, were removed before constructing Table 3. These three RHZ 0% are located in Chr1  
593 (1253+E05 to 1425+E05; 17.3Mb), Chr9 (457+E05 to 664+E05; 20.8Mb) and Chr16 (384+E05 to 463+E05;  
594 8Mb).

595 Tables 4 and 5 show the positions, lengths and presence of protein coding genes for the five most common  
596 ROHi per regional group. Almost every ROHi has at least one protein coding gene, just two ROHi from the  
597 African Khoe and San and one ROHi in Hispanic-American admixed regional groups include no protein  
598 coding genes. Among the genes listed in Tables 4 and 5 there are some already described to be under  
599 positive selection pressure. Hence, there are genes related to brain development: *GPHN*<sup>49; 50</sup>, *PCDH17*<sup>49</sup>,  
600 *DARS*<sup>49; 51</sup>, *SCFD2*<sup>49; 52</sup>, *KIAA0319L*<sup>49</sup>, *EXOC6B*<sup>49; 53</sup>, *SLC30A9*<sup>49; 53</sup>, *CPA6*<sup>54</sup>, *DOCK3*<sup>50; 55</sup>, *CASC4*<sup>50</sup> or *APBA2*<sup>53; 56</sup>;  
601 involved in cancer or tumor processes: *ZCCHC11*<sup>49; 50</sup>, *SPOCK1*<sup>49</sup>, *BCAS3*<sup>49; 53</sup>, *OLFML*<sup>57</sup>, *EIF2S1*<sup>49; 57</sup>, *MPP5*<sup>49</sup>;  
602 <sup>57</sup>, *CXCR4*<sup>51</sup>; skin conditions: *EDAR*<sup>49; 53; 58</sup>, *NOMO1*<sup>59</sup>; color of the eye in Europeans: *HERC2*<sup>56</sup>;  
603 spermatogenesis: *M1AP*, Fanconi anaemia *FANCC*<sup>60</sup>; pulmonary fibrosis: *PARN*<sup>53</sup>; congenital blindness:  
604 *TRPM1*<sup>53</sup>; mitochondrial disorders: *MRPS23*<sup>49</sup>; Charcot-Marie tooth disease: *PLEK*<sup>49; 53</sup>; and other  
605 metabolic and cellular processes (including *SH3RF*<sup>49</sup>, *CUEDC1*<sup>49</sup>, *GOLGA8G*<sup>51</sup>, *PC*<sup>50</sup>). Many of these ROHi  
606 with genes under positive selection are shared by more than one regional group. Without being  
607 exhaustive, the ROHi with the *FANCC* gene is present in all the SSA populations but not outside this region:  
608 28.5% of the Western Africa population has an ROH including this gene, 29.2% of the Gulf of Guinea

609 populations, 19.5% of the Eastern Africa regional group, 23.6% of the people from the Horn of Africa,  
610 17.3% of the population from Southern Africa, 14.4 of the Khoe and San population and 26.9% of the  
611 admixed African-American populations. Another example shared by all SSA, except the Khoe and San  
612 populations, is the ROHi with the *GPHN* gene: 21.7% of prevalence in Western Africa, 17.8% in the Gulf of  
613 Guinea, 22.2% in Eastern Africa, 26.1% in the Africa Horn, 14.9% in Southern Africa and 20.3% of  
614 prevalence in the African-American admixed populations. ROHi with genes under positive selection were  
615 either present in all the populations like the *BCAS3* gene, or just present in only one regional group like  
616 *HERC2* or *EDAR*, in Europe and Eastern Asia respectively. Worthy of comment is the presence of an ROHi  
617 near the *LCT* gene in Europe and Eastern Africa; 38.8% and 19.9% of the European and Eastern Africa  
618 individuals have a ROHi in this gene, but not in other SSA populations.

619 Table 6 shows the three longest RHZ 5%, with the presence of protein coding genes for every regional  
620 population group. In order to build this table, the three longest RHZ 0%, present in all regional groups,  
621 were removed. These three RHZ 0% (Chr1, Chr9 and Chr16) have practically no protein coding genes, just  
622 the *SPATA31*<sup>61</sup> subfamily A member 5 gene on Chr9 that is involved in spermatogenesis and is under  
623 positive selection. Table 6 shows that there are many protein coding genes present in these heterozygous  
624 regions. The RHZ on Chr6 is shared by every regional group but the Khoe and San. It has a length of 4 Mb,  
625 and has more than 140 protein coding genes including many members of the HLA complex family,  
626 olfactory receptor family, MHC class I genes, lymphocyte antigen 6 family, and the psoriasis susceptibility  
627 1 candidate gene among others. As for ROHi, multiple RHZ are shared by different regional groups.

628 It is possible to use differences in ROHi and RHZ across regional groups to obtain a genetic distance that  
629 could provide an evolutionary perspective of the distribution of these homozygous and heterozygous  
630 genomic regions. Figure 9 shows a pairwise comparison of unique ROHi (A) and RHZ (B) in two heatmaps  
631 and, on the right of the figure, a rooted dendrogram for each heatmap using the percentage of unique  
632 RHOi or RHZ as genetic distances. Both rooted dendrograms present similarities and differences in their

633 branching. Both establish two main groups: SSA and out-of-Africa. Within SSA (with the exception of the  
634 Horn of Africa), both dendrograms first split off the Khoe and San from the rest of groups and then both  
635 split Bantu-speaking populations from Southern Africa from the rest. Also, both dendrograms, include the  
636 mixed African-American group in the SSA branch. In the out-of-Africa branch both dendrograms group  
637 together European and admixed Hispanic-American populations. The biggest differences between the two  
638 dendrograms is where they locate the Horn of Africa populations; the ROHi dendrogram groups them with  
639 the out-of-Africa branch, whereas the RHZ dendrogram groups them with the SSA branch.

## 640 **DISCUSSION**

641 SSA populations have been the subject of extensive genomic research with the objective of understanding  
642 their demographic history, current population structure, selection footprints and to advance the field of  
643 biomedical genetics<sup>2-4; 62-65</sup>. To achieve these objectives classic population structure tools like  $F_{ST}$ ,  
644 admixture analysis, and PCA are often used. ROH analyses have not yet been fully explored even though  
645 their usefulness as a tool to decipher different demographic histories is clear and studies range from  
646 research on individuals to describing elaborate worldwide population-based trends<sup>7; 16</sup>. For example, we  
647 have shown (Figures 2 and 3) that populations around the globe experience a reduction in the mean total  
648 length of ROH in length categories above 0.5Mb. Since the length of ROH is inversely proportionate to its  
649 age, a possible explanation for this global phenomenon could be that populations around the world  
650 experienced a size increase about the same time, reducing autozygosity provoked by low  $N_e$  and genetic  
651 drift. However, to put these results into context and compare them to the estimates of population size  
652 already published<sup>27; 66</sup>, it is necessary to determine the age of the different ROH sizes. Preliminary results  
653 estimate that ROH length of 1.5Mb may have a median age of approximately 30 generations (*personal*  
654 *communication D.W. Clark*) and ROH longer than 4 Mb may not be older than 10 generations<sup>8</sup>.  
655 Previous studies in SSA showed that Africa is the continent with the smallest burden of ROH and that  
656 within Africa there is limited heterogeneity in ROH distribution, occurring essentially between the hunter-

657 gatherers and the agro-pastoralists<sup>7; 20; 23</sup>. Our study, however, shows that ROH distribution in SSA is very  
658 heterogenous and much more complex than expected, with different scenarios for ROH shorter and  
659 longer than 1.5Mb. Although the vast majority of SSA populations have a low burden of short ROH, that  
660 is not the case for long ROH where we find SSA populations with a higher burden in comparison to other  
661 populations around the globe. In contrast with previous studies, our fine scale analysis has overcome  
662 some limitations: It has representation of populations from Western, Eastern and Southern Africa; it uses  
663 high-density SNP coverage (~1.2 M SNPs after QC) providing good resolution to accurately call for ROH;  
664 the PLINK software conditions for ROH calling were optimized to accurately call short ROH; and analyses  
665 were developed to understand the ROH distribution and its demographic consequences.

#### 666 **Insights into the past - analysis of short ROH (ROH<1.5Mb)**

667 The demographic history of SSA is characterized by large effective population sizes over many generations  
668 that have led to high genetic diversity, shorter LD structures and lower burden of small ROH<sup>24</sup>. Our study  
669 reports considerable structure in the distribution of short ROH in Africa with populations from the Horn  
670 of Africa (Somali, Oromo and Amhara) having the largest burden of ROH <1.5Mb. In the absence of  
671 evidence to support a different evolutionary trajectory of the effective population size between these and  
672 other SSA populations, the most plausible explanation is that the short ROH were introduced through  
673 admixture of Semitic and Cushitic populations with others from the Arabian Peninsula. It has been found  
674 that Ethiopian individuals are characterized by a large (40-50%) non-African genetic component most  
675 likely originating mainly from Egypt, the Levant and Yemen in a migration that took place approximately  
676 3 thousand years ago (Kya)<sup>28; 67</sup>. This hypothesis is also supported by the ROHi profiling of populations in  
677 the Horn of Africa that have the highest number of short ROHi (0.1 – 0.3Mb) and the shortest mean ROHi  
678 length (0.37Mb) (Table 3), with 83% of ROHi shorter than 0.5Mb. When compared with other regional  
679 groups (Figure 9), the populations from the Horn of Africa share more ROHi with regional groups outside

680 Africa (Figure 9A). There is a reasonably homogeneous burden of short ROH between Western, Gulf of  
 681 Guinea, Eastern and Southern Bantu-speaking groups (Table 1 and Figure 4), but the Khoe and San, having  
 682 split from non-Khoe and San lineages 100 to 150 Kya<sup>68</sup>, show heterogeneity (e.g. Northern Ju, Ju/'hoansi  
 683 have a similar burden to populations in Western Africa, and the Central Khoe-Kwadi and Khwe, have the  
 684 lowest burden in all SSA).

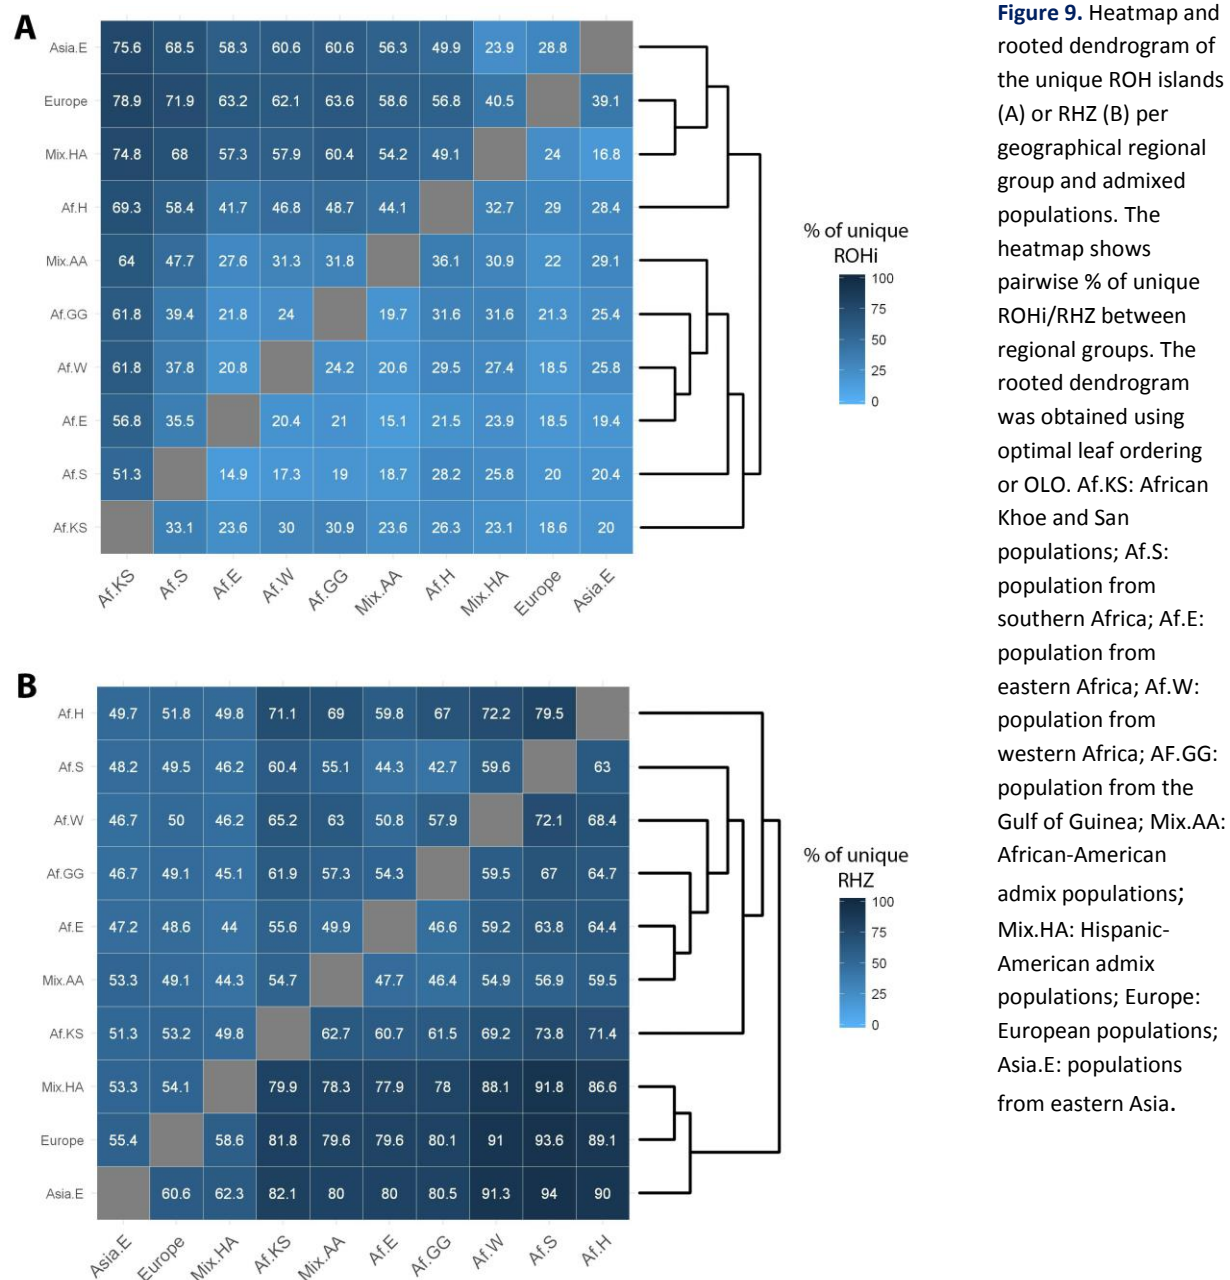

685



686 The shape of the distribution of the ROH <1.5Mb shown in Figure 4 is also highly informative. Admixed  
687 populations, originating from ancestral populations with different ROH burden, would have individuals  
688 with different Sum of ROH<1.5Mb due to their distinct coalescent histories, as is shown in Figure 4 where  
689 most of the admixed populations present platykurtic and skewed distributions. Hispanic-American  
690 populations (CLM, PUR, MXL), with ROH<1.5Mb burden similar to Europeans have a small proportion of  
691 African ancestry (7.8%, 13.9% and 4.3% respectively) but higher proportion of European (66.6%, 73.2%  
692 and 48.7% respectively) and Native American (25.7%, 17.9% and 47.0% respectively) ancestry<sup>69; 70</sup>. The  
693 PEL population has shorter ROH due to a greater Native American ancestry (2.5% African, 20.2 European  
694 and 77.3% Native American)<sup>69; 70</sup>. For these populations ROH<1.5Mb arose before the time of admixture;  
695 estimated as 14 generations for CLM, 7 for MXL and 16 for PUR. PEL population was found to have two  
696 different admixture pulses 12 and 5 generations ago, with the last one being 91.1% Native American<sup>70</sup>. On  
697 the opposite side, African-American admixed populations (ASW and ACB) have reasonably normal  
698 distributions with almost no skewness. These two populations seem to have a very tight distribution and  
699 small burden of ROH<1.5Mb, similar to the Western Africans and Guinea Gulf populations. This could be  
700 explained by the elevated proportion of African ancestry (88% and 75.6% respectively) and small  
701 proportions of European and Native American ancestry (ACB: 11.7% European, 0.3 Nat American; ASW:  
702 21.3% European, 3.1% Nat American)<sup>69; 70</sup>. The South African Coloured populations, another example of  
703 recently (150-300 years) highly admixed populations, have a ROH<1.5Mb burden very similar to Khoe and  
704 San populations. Nevertheless, different studies reported different ancestry components for Coloured  
705 populations arising from Khoe, San, and Bantu speakers, as well as European, South Asian and  
706 Austronesian populations<sup>6; 71</sup> giving insight into the complexity of these admixed populations. Finally, it is  
707 also possible to detect kurtosis and skewness in some Khoe and San populations which would indicate  
708 admixture. Unequivocally, /Gui//Gana, Nama, Karretjie and ≠Khomani distributions for sum of



709 ROH<1.5Mb reveal their admixture origins. In these four Khoe and San populations Bantu and even  
710 European ancestral components were found<sup>23; 72; 73</sup>.

### 711 **Consanguineous cultural practices and modern genetic isolation - analysis of long ROH (ROH>1.5Mb)**

712 The study of ROH>1.5Mb is very useful to shed light on the role of cultural practices in genome  
713 homozygosity levels. Different anthropological and human biology studies have systematically identified  
714 African populations with a clear cultural preference for consanguineous marriages, and some that  
715 purposely avoid such unions<sup>74-83</sup>. For example, one of the most recently published studies, which analysed  
716 548 marriages over the period 1994-96 in the Fulani from Burkina Faso, found that 399 marriages (68.3%)  
717 were between relatives and 185 (31.7%) were between non-related individuals. The average inbreeding  
718 coefficient ( $\alpha$ ) was estimated as 0.0364<sup>82</sup>. Similar inbreeding coefficients were found by other studies, for  
719 example an  $\alpha=0.0322$  in the Khartoum population from Sudan<sup>79</sup>. Our study shows a very heterogeneous  
720 distribution of ROH>1.5Mb among SSA: populations with very little burden of long ROH>1.5Mb, and  
721 completely absence of ROH>4Mb, for example in the Amhara from the Horn of Africa, the Yoruba from  
722 the Gulf of Guinea or the Kikuyu from Eastern Niger-Congo Africa, and populations with a high burden of  
723 ROH>1.5Mb like the Somali from the Horn of Africa, the Fula from Western Africa or the Khoe and San  
724 !Xun and Ju/'hoansi. A heterogeneous distribution of long ROH was found within SSA regions: Somali and  
725 Oromo populations, from the Horn of Africa, speak Cushitic languages, but Somalis are predominantly  
726 Sunni Muslims, with a preference for first-cousin unions, while Oromo people are predominantly  
727 Ethiopian Orthodox or follow traditional religions with no preference for consanguineous unions<sup>84</sup>.  
728 Despite the results presented in this study, in other SSA regions like Guinea Gulf or Eastern Africa  
729 anthropological studies there are groups with cultural preferences for unions between relatives like the  
730 Futajalonke from Guinea<sup>83</sup>, the Baoule from Ivory Coast<sup>83</sup>, the Ewe from Ghana<sup>83</sup>, Arab groups in Kenya<sup>77</sup>,  
731 the Kigali and Tutsi from Rwanda<sup>74</sup> and the Khartoum and Gezira groups from Sudan<sup>79</sup>. Cultural differences

732 among individuals within populations can be inferred from the shapes of the distributions in Figure 4. Not  
733 surprisingly, populations with larger burden of ROH>1.5Mb (in order: !Xun, Ju/'hoansi, Somali, Khew, PEL,  
734 Gui//Gana, CLM, Fula, etc.) have the longest right tails and the highest number of individuals with an  
735 inbreeding coefficient higher than  $F=0.0152$  (Figure 5). Hence, despite previous reports, we have found  
736 African populations with mean genomic inbreeding coefficients ( $F_{ROH}$ ) higher than several other isolated  
737 populations around the world, such as the PEL from Lima in Peru.

738 In order to sketch a more complete picture of genomic homozygosity in SSA populations, it is important  
739 to analyse the origins of this homozygosity. The representation of the mean number of ROH compared to  
740 the mean total sum of ROH showed a right shift for Khoe and San populations like Ju/'hoansi, !Xun,  
741 Gui//Gana or Khwe, indicating the possible presence of recent consanguineous loops and a deviation from  
742 panmixia (Figure 6A). However, if the influence of the  $F_{IS}$  in the  $F_{ROH}$  is represented as shown in Figure 6B,  
743 a different picture is revealed. In summary, it is possible to establish a classification with 3 main groups  
744 characterized by demographic history. Firstly, populations with different levels of cultural consanguinity  
745 practices like Somali, Fula, CLM, GIH and Wolof. Secondly populations with low levels of inbreeding  
746 provoked by their large continental  $N_e$ , in this group we can find the bulk of Europe, Asian and SSA  
747 populations. Thirdly, populations with considerable genetic drift and recent genetic isolation like PEL,  
748 Khwe, Ju/'hoansi, !Xun and Herero. The representation of  $F_{IS}$  vs  $F_{ROH}$  is a better approach to identify the  
749 origins of inbreeding since it provides information about the proportion of  $F_{ROH}$  due to deviation from  
750 panmixia or from genetic isolation. Furthermore, this representation is helpful to identify populations  
751 with an excess of homozygotes possibly due to the Wahlund effect, which may be expected for the  
752 Gui//Gana population, or, more surprisingly, with the Southern Tuu-speaking Khoe and San, the #Khonami  
753 and Karretjie peoples.

754

## 755 **Genomic distribution of ROH and the identification of regions under selection**

756 Examining ROH has been shown to be useful for studying genome biology and to identify regions under  
757 selection<sup>19-21</sup>. The existence of ROH islands (ROHi) and regions of heterozygosity (RHZ) can be explained  
758 in part as a consequence of stochastic processes across the genome, or by variation of the effects of  
759 demographic processes across the genome, influencing genetic diversity<sup>7; 20</sup>. However, there is increasing  
760 evidence that ROH islands may be a consequence of positive selection processes that reduce haplotype  
761 diversity and increase homozygosity around the target locus, increasing ROH frequencies in the regions  
762 under selection<sup>20; 85</sup>. Besides the presence of specific protein coding genes, previously detected to be  
763 under positive selection, in the five most prevalent ROHi (Table 4 and 5), we identified other genes  
764 previously shown to be under positive selection in African populations<sup>2; 23; 65</sup>. Different loci associated  
765 with infectious disease susceptibility and severity, including *HP*<sup>2</sup>, *CLTA4*<sup>86</sup> and *PKLR*<sup>87</sup> for malaria, *IFIH1*<sup>88</sup>  
766 and *OAS2*<sup>2</sup> for Lassa fever, *FAS*<sup>89</sup> for Trypanosomiasis and other genes involved in general immune  
767 response (e.g. *PRSS16*<sup>23</sup> and *POM121L2*<sup>23</sup>) were found within ROHi in different geographical regions. For  
768 example, *CTLA4* was found in ROHi in every region, but *HP* and *PKLR* were found to be in ROHi just in  
769 Western and Eastern SSA and in the Horn of Africa. Other genes related to trypanosomiasis infection and  
770 kidney disease, like *APOL1*<sup>90</sup>, or to different forms of hypertension, like *ATP1A1*<sup>2</sup>, *AQP2*<sup>2</sup> and *CSK*<sup>2,91</sup> were  
771 found in ROHi in different regions from SSA. As was shown in Table 6 within RHZ haplotypes it is also  
772 possible to find multiple protein coding genes related to diverse biological functions like immune response  
773 (*HLA* complex or *IRF* gene family), cellular cycle (*ANP32A*<sup>92; 93</sup>), chromosomal aberrations (like different  
774 members of the *GOLGA* gene family<sup>94</sup>) cancer (*NOX5*<sup>95</sup>), brain development (*KIAA0513*<sup>96</sup>) and olfactory  
775 receptors (*OR* gene family) among others. These heterozygous regions might represent haplotypes  
776 enriched for variants that have a negative impact on fitness in homozygosity, or regions that harbor loci  
777 with heterozygote advantage (overdominance) under any form of balancing selection. Furthermore, this  
778 hypothesis is also supported by the fact that it is possible to establish differences and similarities between

779 the locations of ROHi and RHZ between populations from different geographic regions, as it is shown in  
780 Figure 9. Furthermore, since the majority (more than 75%) of ROHi and RHZ identified in this study include  
781 genomic regions that had previously been identified as sites of recent selection, this analysis raises the  
782 possibility that other loci in ROHi and RHZ may also harbor genes that have been subjected to positive or  
783 balancing selection.

## 784 **Conclusion**

785 Detailed ROH analysis demonstrated a heterogeneous distribution of autozygosity across SSA populations  
786 shedding light on the complex demographic history of the region. While short ROH (ROH<1.5Mb) provided  
787 insights into effective population size and past admixture events, long ROH (ROH>1.5Mb) informed us  
788 about the impact of consanguineous cultural practices, modern endogamy and genetic isolation. We also  
789 showed that ROHi and RHZ can be used to identify genomic regions under selection pressure. Studying a  
790 better representation and larger sample size across different SSA populations will provide more nuanced  
791 interpretations of demographic histories. The H3Africa (Human Heredity and Health in Africa) initiative is  
792 generating genomic data including whole genome and exome sequences and genome-wide genotyping  
793 using an African tailored array that captures common genetic diversity in African genomes<sup>3,4</sup>. The added  
794 value of this resource lies in its rich phenotype and clinically relevant data that will enable biomedical  
795 research across the continent making it possible to study the distribution of ROH and RHZ in common  
796 complex traits.

## 797 **Supplemental Data**

798 Supplemental Data include eight figures and Supplemental Material and Methods including the  
799 optimization of PLINK ROH calling algorithm to obtain short ROH and the comparison of ROH obtained  
800 from the same samples with different SNP coverage.

801 **Acknowledgments**

802 FCC is a National Research Foundation of South Africa (NRF) postdoctoral fellow and MR holds a South  
803 African Research Chair in Genomics and Bioinformatics of African populations hosted by the University  
804 of the Witwatersrand, funded by the Department of Science and Technology and administered by the  
805 NRF.

806 **Declaration of Interests**

807 Authors declare that they have no competing interests.

808 **References**

- 809 1. Campbell, M.C., and Tishkoff, S.A. (2008). African genetic diversity: implications for human demographic  
810 history, modern human origins, and complex disease mapping. *Annu. Rev. Genom. Hum. Genet.*  
811 9, 403-433.
- 812 2. Gurdasani, D., Carstensen, T., Tekola-Ayele, F., Pagani, L., Tachmazidou, I., Hatzikotoulas, K.,  
813 Karthikeyan, S., Iles, L., Pollard, M.O., Choudhury, A., et al. (2015). The African Genome Variation  
814 Project shapes medical genetics in Africa. *Nature* 517, 327-332.
- 815 3. H3Africa Consortium, Rotimi, C., Abayomi, A., Abimiku, A., Adabayeri, V.M., Adebamowo, C., Adebiji,  
816 E., Ademola, A.D., Adeyemo, A., Adu, D., et al. (2014). Research capacity. Enabling the genomic  
817 revolution in Africa. *Science* 344, 1346-1348.
- 818 4. Ramsay, M., Crowther, N., Tambo, E., Agongo, G., Baloyi, V., Dikotope, S., Gomez-Olive, X., Jaff, N.,  
819 Sorgho, H., Wagner, R., et al. (2016). H3Africa AWI-Gen Collaborative Centre: a resource to study  
820 the interplay between genomic and environmental risk factors for cardiometabolic diseases in  
821 four sub-Saharan African countries. *Global Health, Epidemiology and Genomics* 1, e20.
- 822 5. Collins, F.S., Green, E.D., Guttmacher, A.E., Guyer, M.S., and Institute, U.S.N.H.G.R. (2003). A vision for  
823 the future of genomics research. *Nature* 422, 835-847.
- 824 6. Choudhury, A., Ramsay, M., Hazelhurst, S., Aron, S., Bardien, S., Botha, G., Chimusa, E.R., Christoffels,  
825 A., Gamielidien, J., Sefid-Dashti, M.J., et al. (2017). Whole-genome sequencing for an enhanced  
826 understanding of genetic variation among South Africans. *Nat. Commun.* 8, 2062.
- 827 7. Ceballos, F.C., Joshi, P.K., Clark, D.W., Ramsay, M., and Wilson, J.F. (2018). Runs of homozygosity:  
828 windows into population history and trait architecture. *Nat. Rev. Genet.* 19, 220-234.
- 829 8. McQuillan, R., Leutenegger, A.L., Abdel-Rahman, R., Franklin, C.S., Pericic, M., Barac-Lauc, L., Smolej-  
830 Narancic, N., Janicijevic, B., Polasek, O., Tenesa, A., et al. (2008). Runs of homozygosity in  
831 European populations. *Am. J. Hum. Genet.* 83, 359-372.
- 832 9. Kirin, M., McQuillan, R., Franklin, C.S., Campbell, H., McKeigue, P.M., and Wilson, J.F. (2010). Genomic  
833 runs of homozygosity record population history and consanguinity. *PLoS One* 5, e13996.
- 834 10. Broman, K.W., and Weber, J.L. (1999). Long homozygous chromosomal segments in reference families  
835 from the centre d'Etude du polymorphisme humain. *Am. J. Hum. Genet.* 65, 1493-1500.
- 836 11. Gunderson, R.C. (1980). Connecting your pedigree into royal, noble and medieval families. (Salt Lake  
837 City: Genealogical Society of Utah).
- 838 12. Alvarez, G., Quinteiro, C., and Ceballos, F.C. (2011). Inbreeding and Genetic disorders. In *Advances in*  
839 *the Study of Genetic Disorders*, K. Ikehara, ed. (Rijeka, InTech).

- 840 13. Crow, J.F., and Kimura, A. (1970). An introduction to population genetics theory.(New York: Harper &  
841 Row).
- 842 14. Alvarez, G., Ceballos, F.C., and Quinteiro, C. (2009). The role of inbreeding in the extinction of a  
843 European royal dynasty. *PLoS One* 4, e5174.
- 844 15. Ceballos, F.C., Hazelhurst, S., and Ramsay, M. (2018). Assessing runs of Homozygosity: a comparison  
845 of SNP Array and whole genome sequence low coverage data. *BMC Genomics* 19, 106.
- 846 16. Joshi, P.K., Esko, T., Mattsson, H., Eklund, N., Gandin, I., Nutile, T., Jackson, A.U., Schurmann, C., Smith,  
847 A.V., Zhang, W., et al. (2015). Directional dominance on stature and cognition in diverse human  
848 populations. *Nature* 523, 459-462.
- 849 17. McQuillan, R., Eklund, N., Pirastu, N., Kuningas, M., McEvoy, B.P., Esko, T., Corre, T., Davies, G.,  
850 Kaakinen, M., Lyytikäinen, L.P., et al. (2012). Evidence of inbreeding depression on human height.  
851 *PLoS Genet.* 8, e1002655.
- 852 18. Gibson, J., Morton, N.E., and Collins, A. (2006). Extended tracts of homozygosity in outbred human  
853 populations. *Hum. Mol. Genet.* 15, 789-795.
- 854 19. Nothnagel, M., Lu, T.T., Kayser, M., Krawczak, M., Spain, S.L., Cazier, J.B., Houlston, R., Carvajal-  
855 Carmona, L., Tomlinson, I., Vine, A.E., et al. (2010). Genomic and geographic distribution of SNP-  
856 defined runs of homozygosity in Europeans. *Hum. Mol. Genet.* 19, 2927-2935.
- 857 20. Pemberton, T.J., Absher, D., Feldman, M.W., Myers, R.M., Rosenberg, N.A., and Li, J.Z. (2012). Genomic  
858 patterns of homozygosity in worldwide human populations. *Am. J. Hum. Genet.* 91, 275-292.
- 859 21. Curtis, D., Vine, A.E., and Knight, J. (2008). Study of regions of extended homozygosity provides a  
860 powerful method to explore haplotype structure of human populations. *Ann. Hum. Genet.* 72,  
861 261-278.
- 862 22. Henn, B.M., Gignoux, C.R., Jobin, M., Granka, J.M., Macpherson, J.M., Kidd, J.M., Rodriguez-Botigue,  
863 L., Ramachandran, S., Hon, L., Brisbin, A., et al. (2011). Hunter-gatherer genomic diversity suggests  
864 a southern African origin for modern humans. *Proc. Natl. Acad. Sci. U. S. A.* 108, 5154-5162.
- 865 23. Schlebusch, C.M., Skoglund, P., Sjödin, P., Gattepaille, L.M., Hernandez, D., Jay, F., Li, S., De Jongh, M.,  
866 Singleton, A., Blum, M.G.B., et al. (2012). Genomic Variation in Seven Khoe-San Groups Reveals  
867 Adaptation and Complex African History. *Science* 338, 374-379.
- 868 24. Henn, B.M., Botigue, L.R., Peischl, S., Dupanloup, I., Lipatov, M., Maples, B.K., Martin, A.R., Musharoff,  
869 S., Cann, H., Snyder, M.P., et al. (2016). Distance from sub-Saharan Africa predicts mutational load  
870 in diverse human genomes. *Proc. Natl. Acad. Sci. U. S. A.* 113, E440-449.
- 871 25. The 1000 Genomes Project, C. (2015). A global reference for human genetic variation. *Nature* 526, 68-  
872 74.
- 873 26. Li, J.Z., Absher, D.M., Tang, H., Southwick, A.M., Casto, A.M., Ramachandran, S., Cann, H.M., Barsh,  
874 G.S., Feldman, M., Cavalli-Sforza, L.L., et al. (2008). Worldwide human relationships inferred from  
875 genome-wide patterns of variation. *Science* 319, 1100-1104.
- 876 27. Mallick, S., Li, H., Lipson, M., Mathieson, I., Gymrek, M., Racimo, F., Zhao, M., Chennagiri, N.,  
877 Nordenfelt, S., Tandon, A., et al. (2016). The Simons Genome Diversity Project: 300 genomes from  
878 142 diverse populations. *Nature* 538, 201-206.
- 879 28. Pagani, L., Kivisild, T., Tarekegn, A., Ekong, R., Plaster, C., Romero, I.G., Ayub, Q., Mehdi, S.Q., Thomas,  
880 M.G., Luiselli, D., et al. (2012). Ethiopian Genetic Diversity Reveals Linguistic Stratification and  
881 Complex Influences on the Ethiopian Gene Pool. *Am. J. Hum. Genet.* 91, 83-96.
- 882 29. Hollfelder, N., Schlebusch, C.M., Gunther, T., Babiker, H., Hassan, H.Y., and Jakobsson, M. (2017).  
883 Northeast African genomic variation shaped by the continuity of indigenous groups and Eurasian  
884 migrations. *PLoS Genet.* 13, e1006976.
- 885 30. Sudmant, P.H., Rausch, T., Gardner, E.J., Handsaker, R.E., Abyzov, A., Huddleston, J., Zhang, Y., Ye, K.,  
886 Jun, G., Hsi-Yang Fritz, M., et al. (2015). An integrated map of structural variation in 2,504 human  
887 genomes. *Nature* 526, 75-81.

- 888 31. Barnard, A. (1992). *Hunters and Herders of Southern Africa - A Comparative Ethnography of the*  
889 *Khoisan Peoples.*(Cambridge: Cambridge University Press).
- 890 32. Purcell, S., Neale, B., Todd-Brown, K., Thomas, L., Ferreira, M.A.R., Bender, D., Maller, J., Sklar, P., de  
891 Bakker, P.I.W., Daly, M.J., et al. (2007). PLINK: A tool set for whole-genome association and  
892 population-based linkage analyses. *Am. J. Hum. Genet.* 81, 559-575.
- 893 33. Howrigan, D.P., Simonson, M.A., and Keller, M.C. (2011). Detecting autozygosity through runs of  
894 homozygosity: a comparison of three autozygosity detection algorithms. *BMC Genomics* 12, 460.
- 895 34. International HapMap, C., Frazer, K.A., Ballinger, D.G., Cox, D.R., Hinds, D.A., Stuve, L.L., Gibbs, R.A.,  
896 Belmont, J.W., Boudreau, A., Hardenbol, P., et al. (2007). A second generation human haplotype  
897 map of over 3.1 million SNPs. *Nature* 449, 851-861.
- 898 35. Shifman, S. (2003). Linkage disequilibrium patterns of the human genome across populations. *Hum.*  
899 *Mol. Genet.* 12, 771-776.
- 900 36. Slatkin, M. (2008). Linkage disequilibrium - understanding the evolutionary past and mapping the  
901 medical future. *Nat. Rev. Genet.* 9, 477-485.
- 902 37. Team, R.C. (2017). *A Language and Environment for Statistical Computing.* In. (R Foundation for  
903 Statistical Computing).
- 904 38. Jacquard, A. (1975). Inbreeding - One word, several meanings. *Theoretical Population Biology* 7, 338-  
905 363.
- 906 39. Templeton, A., R, and Read, B. (1996). Inbreeding, One Word, Several Meanings, Much Confusion. *Biol.*  
907 *Conserv.* 75.
- 908 40. Glemin, S. (2003). How are deleterious mutations purged? Drift versus nonrandom mating. *Evolution*  
909 57, 2678-2687.
- 910 41. Wright, S. (1950). Genetical structure of populations. *Nature* 166, 247-249.
- 911 42. Wright, S. (1922). Coefficients of Inbreeding and relationship. *Amer. Naturalist* 56, 330-338.
- 912 43. Weir, B.S. (2012). Estimating F-statistics: A historical view. *The British Journal for the Philosophy of*  
913 *Science* 79, 637-643.
- 914 44. Galili, T., O'Callaghan, A., Sidi, J., and Sievert, C. (2018). *heatmaply: an R package for creating*  
915 *interactive cluster heatmaps for online publishing.* *Bioinformatics* 34, 1600-1602.
- 916 45. Brandes, U. (2007). Optimal leaf ordering of complete binary trees. *Journal of Discrete Algorithms* 5,  
917 546-552.
- 918 46. Consortium, E.P. (2012). An integrated encyclopedia of DNA elements in the human genome. *Nature*  
919 489, 57-74.
- 920 47. Bittles, A.H., and Black, M.L. (2010). Consanguinity, human evolution, and complex diseases. *Proc.*  
921 *Natl. Acad. Sci. U. S. A.* 107, 1779-1786.
- 922 48. Hartl, D.L., and Clark, A.G. (2007). *Principles of population Genetics.*(Sunderland: Sinauer Associates).
- 923 49. Liu, X., Ong, R.T., Pillai, E.N., Elzein, A.M., Small, K.S., Clark, T.G., Kwiatkowski, D.P., and Teo, Y.Y. (2013).  
924 Detecting and characterizing genomic signatures of positive selection in global populations. *Am.*  
925 *J. Hum. Genet.* 92, 866-881.
- 926 50. Lopman, B., and Gregson, S. (2008). When did HIV incidence peak in Harare, Zimbabwe? Back-  
927 calculation from mortality statistics. *PLoS One* 3, e1711.
- 928 51. Chen, H., Patterson, N., and Reich, D. (2010). Population differentiation as a test for selective sweeps.  
929 *Genome Res.* 20, 393-402.
- 930 52. Mendizabal, I., Marigorta, U.M., Lao, O., and Comas, D. (2012). Adaptive evolution of loci covarying  
931 with the human African Pygmy phenotype. *Hum. Genet.* 131, 1305-1317.
- 932 53. Grossman, S.R., Andersen, K.G., Shlyakhter, I., Tabrizi, S., Winnicki, S., Yen, A., Park, D.J., Griesemer,  
933 D., Karlsson, E.K., Wong, S.H., et al. (2013). Identifying recent adaptations in large-scale genomic  
934 data. *Cell* 152, 703-713.



- 935 54. Lopez Herraez, D., Bauchet, M., Tang, K., Theunert, C., Pugach, I., Li, J., Nandineni, M.R., Gross, A.,  
936 Scholz, M., and Stoneking, M. (2009). Genetic variation and recent positive selection in worldwide  
937 human populations: evidence from nearly 1 million SNPs. *PLoS One* 4, e7888.
- 938 55. Higasa, K., Kukita, Y., Kato, K., Wake, N., Tahira, T., and Hayashi, K. (2009). Evaluation of haplotype  
939 inference using definitive haplotype data obtained from complete hydatidiform moles, and its  
940 significance for the analyses of positively selected regions. *PLoS Genet.* 5, e1000468.
- 941 56. Beleza, S., Johnson, N.A., Candille, S.I., Absher, D.M., Coram, M.A., Lopes, J., Campos, J., Araujo, II,  
942 Anderson, T.M., Vilhjalmsson, B.J., et al. (2013). Genetic architecture of skin and eye color in an  
943 African-European admixed population. *PLoS Genet.* 9, e1003372.
- 944 57. Wagh, K., Bhatia, A., Alexe, G., Reddy, A., Ravikumar, V., Seiler, M., Boemo, M., Yao, M., Cronk, L.,  
945 Naqvi, A., et al. (2012). Lactase persistence and lipid pathway selection in the Maasai. *PLoS One*  
946 7, e44751.
- 947 58. Kamberov, Y.G., Wang, S., Tan, J., Gerbault, P., Wark, A., Tan, L., Yang, Y., Li, S., Tang, K., Chen, H., et  
948 al. (2013). Modeling recent human evolution in mice by expression of a selected EDAR variant.  
949 *Cell* 152, 691-702.
- 950 59. Oleksyk, T.K., Zhao, K., De La Vega, F.M., Gilbert, D.A., O'Brien, S.J., and Smith, M.W. (2008). Identifying  
951 selected regions from heterozygosity and divergence using a light-coverage genomic dataset from  
952 two human populations. *PLoS One* 3, e1712.
- 953 60. Wang, E.T., Kodama, G., Baldi, P., and Moyzis, R.K. (2006). Global landscape of recent inferred  
954 Darwinian selection for *Homo sapiens*. *Proc. Natl. Acad. Sci. U. S. A.* 103, 135-140.
- 955 61. Bekpen, C., Kunzel, S., Xie, C., Eaaswarkhanth, M., Lin, Y.L., Gokcumen, O., Akdis, C.A., and Tautz, D.  
956 (2017). Segmental duplications and evolutionary acquisition of UV damage response in the  
957 SPATA31 gene family of primates and humans. *BMC Genomics* 18, 222.
- 958 62. Patin, E., Lopez, M., Grollemund, R., Verdu, P., Harmant, C., Quach, H., Laval, G., Perry, G.H., Barreiro,  
959 L.B., Froment, A., et al. (2017). Dispersals and genetic adaptation of Bantu-speaking populations  
960 in Africa and North America. *Science* 356, 543-546.
- 961 63. Marks, S.J., Montinaro, F., Levy, H., Brisighelli, F., Ferri, G., Bertoincini, S., Batini, C., Busby, G.B., Arthur,  
962 C., Mitchell, P., et al. (2015). Static and moving frontiers: the genetic landscape of Southern  
963 African Bantu-speaking populations. *Mol. Biol. Evol.* 32, 29-43.
- 964 64. Uren, C., Kim, M., Martin, A.R., Bobo, D., Gignoux, C.R., van Helden, P.D., Moller, M., Hoal, E.G., and  
965 Henn, B.M. (2016). Fine-Scale Human Population Structure in Southern Africa Reflects  
966 Ecogeographic Boundaries. *Genetics* 204, 303-314.
- 967 65. Chimusa, E.R., Meintjies, A., Tchang, M., Mulder, N., Seoighe, C., Soodyall, H., and Ramesar, R. (2015).  
968 A genomic portrait of haplotype diversity and signatures of selection in indigenous southern  
969 African populations. *PLoS Genet.* 11, e1005052.
- 970 66. Okada, Y., Momozawa, Y., Sakaue, S., Kanai, M., Ishigaki, K., Akiyama, M., Kishikawa, T., Arai, Y., Sasaki,  
971 T., Kosaki, K., et al. (2018). Deep whole-genome sequencing reveals recent selection signatures  
972 linked to evolution and disease risk of Japanese. *Nat. Commun.* 9, 1631.
- 973 67. Pickrell, J.K., Patterson, N., Loh, P.R., Lipson, M., Berger, B., Stoneking, M., Pakendorf, B., and Reich,  
974 D. (2014). Ancient west Eurasian ancestry in southern and eastern Africa. *Proc. Natl. Acad. Sci. U.*  
975 *S. A.* 111, 2632-2637.
- 976 68. Kim, H.L., Ratan, A., Perry, G.H., Montenegro, A., Miller, W., and Schuster, S.C. (2014). Khoisan hunter-  
977 gatherers have been the largest population throughout most of modern-human demographic  
978 history. *Nat. Commun.* 5, 5692.
- 979 69. Montinaro, F., Busby, G.B., Pascali, V.L., Myers, S., Hellenthal, G., and Capelli, C. (2015). Unravelling  
980 the hidden ancestry of American admixed populations. *Nat. Commun.* 6, 6596.

- 981 70. Martin, A.R., Gignoux, C.R., Walters, R.K., Wojcik, G.L., Neale, B.M., Gravel, S., Daly, M.J., Bustamante,  
982 C.D., and Kenny, E.E. (2017). Human Demographic History Impacts Genetic Risk Prediction across  
983 Diverse Populations. *Am. J. Hum. Genet.* 100, 635-649.
- 984 71. Daya, M., van der Merwe, L., Galal, U., Moller, M., Salie, M., Chimusa, E.R., Galanter, J.M., van Helden,  
985 P.D., Henn, B.M., Gignoux, C.R., et al. (2013). A panel of ancestry informative markers for the  
986 complex five-way admixed South African coloured population. *PLoS One* 8, e82224.
- 987 72. Busby, G.B., Band, G., Si Le, Q., Jallow, M., Bougama, E., Mangano, V.D., Amenga-Etego, L.N., Enimil,  
988 A., Apinjoh, T., Ndila, C.M., et al. (2016). Admixture into and within sub-Saharan Africa. *Elife* 5.
- 989 73. Schuster, S.C., Miller, W., Ratan, A., Tomsho, L.P., Giardine, B., Kasson, L.R., Harris, R.S., Petersen, D.C.,  
990 Zhao, F., Qi, J., et al. (2010). Complete Khoisan and Bantu genomes from southern Africa. *Nature*  
991 463, 943-947.
- 992 74. Lesthaeghe, R., Kaufmann, G., and Meekers, D. (1989). The Nuptiality Regimens in Sub-Saharan Africa.  
993 In *REproduction and Social Organization in Sub-Saharan Africa*, R. Lesthaeghe, ed. (Berkeley,  
994 University of California Press).
- 995 75. Bledsoe, C. (2002). *Contingent Lives: Fertility, Time, and Aging in West Africa*. (Chicago: The University  
996 of Chicago Press).
- 997 76. Schapera, I. (1957). Marriage of Near Kin among the Tswana. *Journal of the International African*  
998 *Studies* 27, 139-159.
- 999 77. Tanner, R.E. (1958). Fertility and child mortality in cousin marriages. A Study in a Moslem Community  
1000 in East Africa. *The Eugenetics Review* 49, 197-199.
- 1001 78. Ahmed, A.H. (1979). Consanguinity and schizophrenia in Sudan. *The British Journal of Psychiatry* 134,  
1002 635-636.
- 1003 79. Saha, N., and El Sheikh, F.S. (1988). Inbreeding levels in Khartoum. *J. Biosoc. Sci.* 20, 333-336.
- 1004 80. Scott-Emuakpor, A.B. (1974). The mutation load in an African population. I. An analysis of  
1005 consanguineous marriages in Nigeria. *Am. J. Hum. Genet.* 26, 674-682.
- 1006 81. Caldwell, J.C., Caldwell, P., and Orunloye, I.O. (1992). The Family and Sexual Networking in Sub-  
1007 Saharan Africa: Historical Regional Differences and Present-Day Implications. *Population Studies*  
1008 46, 385-410.
- 1009 82. Hampshire, K.R., and Smith, M.T. (2001). Consanguineous Marriage among the Fulani. *Hum. Biol.* 73,  
1010 597-603.
- 1011 83. Bittles, A.H. (1998). *Empirical Estimates of the Global Prevalence of Consanguineous Marriage in*  
1012 *Contemporary Societies*. (Stanford, California: Morrison Institute for Population and Resource  
1013 Studies).
- 1014 84. Bittles, A.H. (2012). *Consanguinity in context*. (Cambridge: Cambridge University Press).
- 1015 85. Lencz, T., Lambert, C., DeRosse, P., Burdick, K.E., Morgan, T.V., Kane, J.M., Kucherlapati, R., and  
1016 Malhotra, A.K. (2007). Runs of homozygosity reveal highly penetrant recessive loci in  
1017 schizophrenia. *Proc. Natl. Acad. Sci. U. S. A.* 104, 19942-19947.
- 1018 86. Jacobs, T., Graefe, S.E.B., Niknafs, S., Gaworski, I., and Fleischer, B. (2002). Murine Malaria is  
1019 Exacerbated by CTLA-4 Blockade. *The Journal of Immunology* 169, 2323-2329.
- 1020 87. Machado, P., Pereira, R., Rocha, A.M., Manco, L., Fernandes, N., Miranda, J., Ribeiro, L., do Rosario,  
1021 V.E., Amorim, A., Gusmao, L., et al. (2010). Malaria: looking for selection signatures in the human  
1022 PKLR gene region. *Br. J. Haematol.* 149, 775-784.
- 1023 88. Fumagalli, M., Cagliani, R., Riva, S., Pozzoli, U., Biasin, M., Piacentini, L., Comi, G.P., Bresolin, N., Clerici,  
1024 M., and Sironi, M. (2010). Population genetics of IFIH1: ancient population structure, local  
1025 selection, and implications for susceptibility to type 1 diabetes. *Mol. Biol. Evol.* 27, 2555-2566.
- 1026 89. Martins, G.A., Petkova, S.B., Machado, F.S., Kitsis, R.N., Weiss, L.M., Wittner, M., Tanowitz, H.B., and  
1027 Silva, J.S. (2001). Fas-FasL interaction modulates nitric oxide production in *Trypanosoma cruzi*-  
1028 infected mice. *Immunology* 103, 122-129.

- 1029 90. Ko, W.Y., Rajan, P., Gomez, F., Scheinfeldt, L., An, P., Winkler, C.A., Froment, A., Nyambo, T.B., Omar,  
1030 S.A., Wambebe, C., et al. (2013). Identifying Darwinian selection acting on different human APOL1  
1031 variants among diverse African populations. *Am. J. Hum. Genet.* 93, 54-66.
- 1032 91. Voight, B.F., Kudaravalli, S., Wen, X., and Pritchard, J.K. (2006). A map of recent positive selection in  
1033 the human genome. *PLoS Biol.* 4, e72.
- 1034 92. Opal, P., Garcia, J.J., Propst, F., Matilla, A., Orr, H.T., and Zoghbi, H.Y. (2003). Mapmodulin/leucine-rich  
1035 acidic nuclear protein binds the light chain of microtubule-associated protein 1B and modulates  
1036 neuritogenesis. *J. Biol. Chem.* 278, 34691-34699.
- 1037 93. Schafer, Z.T., Parrish, A.B., Wright, K.M., Margolis, S.S., Marks, J.R., Deshmukh, M., and Kornbluth, S.  
1038 (2006). Enhanced sensitivity to cytochrome c-induced apoptosis mediated by PHAPI in breast  
1039 cancer cells. *Cancer Res.* 66, 2210-2218.
- 1040 94. Silano, M., Di Benedetto, R., Trecca, A., Arrabito, G., Leonardi, F., and De Vincenzi, M. (2007). A  
1041 decapeptide from durum wheat prevents celiac peripheral blood lymphocytes from activation by  
1042 gliadin peptides. *Pediatr. Res.* 61, 67-71.
- 1043 95. Fu, X., Beer, D.G., Behar, J., Wands, J., Lambeth, D., and Cao, W. (2006). cAMP-response element-  
1044 binding protein mediates acid-induced NADPH oxidase NOX5-S expression in Barrett esophageal  
1045 adenocarcinoma cells. *J. Biol. Chem.* 281, 20368-20382.
- 1046 96. Lauriat, T.L., Dracheva, S., Kremerskothen, J., Duning, K., Haroutunian, V., Buxbaum, J.D., Hyde, T.M.,  
1047 Kleinman, J.E., and McInnes, L.A. (2006). Characterization of KIAA0513, a novel signaling molecule  
1048 that interacts with modulators of neuroplasticity, apoptosis, and the cytoskeleton. *Brain Res.*  
1049 1121, 1-11.
- 1050

## Supplemental Material and Methods.

### Description of the Data and the Methodology

PLINK's observational approach underestimates small ROH (shorter than 500Kb) when using recommended conditions (50 as the minimum number of SNP that the PLINK's sliding window, and ROH, is required to have) in array-genotyped data in comparison to whole genome sequence low coverage<sup>1</sup>. For the analysis of the current study it is important to have accurate ROH estimates for sizes as short as 300 Kb. In order to achieve this goal, we tested different PLINK parameters of ROH calling in array-based data and compared them with ROH obtained from low coverage (3-6x) whole genome sequence. We therefore published the required PLINK conditions to obtain equivalent results, with parameters for ROH longer than 1.5Mb, between WGS low coverage and SNP array technologies<sup>1</sup>. In the current study we used the same conditions as a starting point to obtain equivalent short ROH estimations.

Individuals with both genome-wide SNP genotypic data and WGS low coverage data from the 1000 Genomes Project – Phase 3 (KGP) and the African Genome Variation Project (AGVP) were used. For both datasets the Infinium Omni 2.5-8 Bead chip from Illumina was used. The KGP includes a total of 1685 individuals from 18 populations with genotypic data available from array and WGS low coverage (4x): European ancestry FIN (n=99), GBR (n=91), IBS (n=105), TSI (Tuscani n=102) and CEU (n=99); African-American ancestry ASW (n=61) and ACB (n=96); Hispanic-American ancestry PUR (n=104), PEL (n=85), CLM (n=95) and MXL (n=100); Eastern Asia ancestry CDX (n=98), CHB (n=100), CHS (n=105), JPT (n=100) and KHV (n=99); and African ancestry YRI (n=108) and LWK (n=99). The AVGP includes 200 samples (100 Zulu and 100 Baganda) where array-genotype data and WGS low coverage (4x) are available. For each population, data from both array genotyping and WGS were filtered to remove MAF <0.05 and those diverging from H-W with  $p < 0.001$ . Only SNPs of the 22 autosomes were included in the analysis.

We used PLINK v1.9 to identify ROH. The following conditions were used to call ROH in the WGS low coverage data `--homozyg-snp 50, --homozyg-kb 300, --homozyg-density 50, --homozyg-gap 1000, --homozyg-window-snp 50, --homozyg-window-het 3`. For array-genotype data the following conditions were used: `--homozyg-snp (30, 40, 50), --homozyg-kb 300, --homozyg-density (30, 40, 50), --homozyg-gap 1000, --homozyg-window-snp (30, 40, 50), --homozyg-het 1`.

Using violin plots for visualisation of the ROH data distribution, we performed an exploratory data analysis comparing five different ROH class sizes obtained from array-genotype and WGS data. Class 1:  $300\text{Kb} < \text{ROH} \leq 500\text{Kb}$ ; Class 2:  $500\text{Kb} < \text{ROH} \leq 700\text{Kb}$ ; Class 3:  $700\text{Kb} < \text{ROH} \leq 900\text{Kb}$ ; Class 4:  $900\text{Kb} < \text{ROH} \leq 1000\text{Kb}$ ; Class 5:  $1000\text{Kb} < \text{ROH} \leq 1500\text{Kb}$ .

### Results and Conclusions

In Figures S1 to S5 show violin plots of the sum of ROH for the five classes of ROH lengths. For each of the continental divisions (Africa: Figure S1; Hispanic-American: Figure S2; African-American: Figure S3; Asian: Figure S4 and Europe: Figure S5) we demonstrate that some adjustments are appropriate when dealing with array-genotype data. For example, when we relax PLINK's conditions to 30 SNPs per sliding window and ROH, it is possible to obtain more equivalent sum of ROH estimates for Class 1 and 2 (300Kb to 700Kb) than when using previously recommended conditions (50 SNP). Furthermore, the sum of ROH estimates didn't change much when considered ROH longer than 700Kb.

According to these results we can conclude that by using a sliding window of 30 SNPs in PLINK we can obtain a better estimation of short ROH that does not interfere with the estimation of longer ROH.

### Supplemental References

1. Ceballos, F.C., Hazelhurst, S., and Ramsay, M. (2018). Assessing runs of Homozygosity: a comparison of SNP Array and whole genome sequence low coverage data. *BMC Genomics* 19, 106.

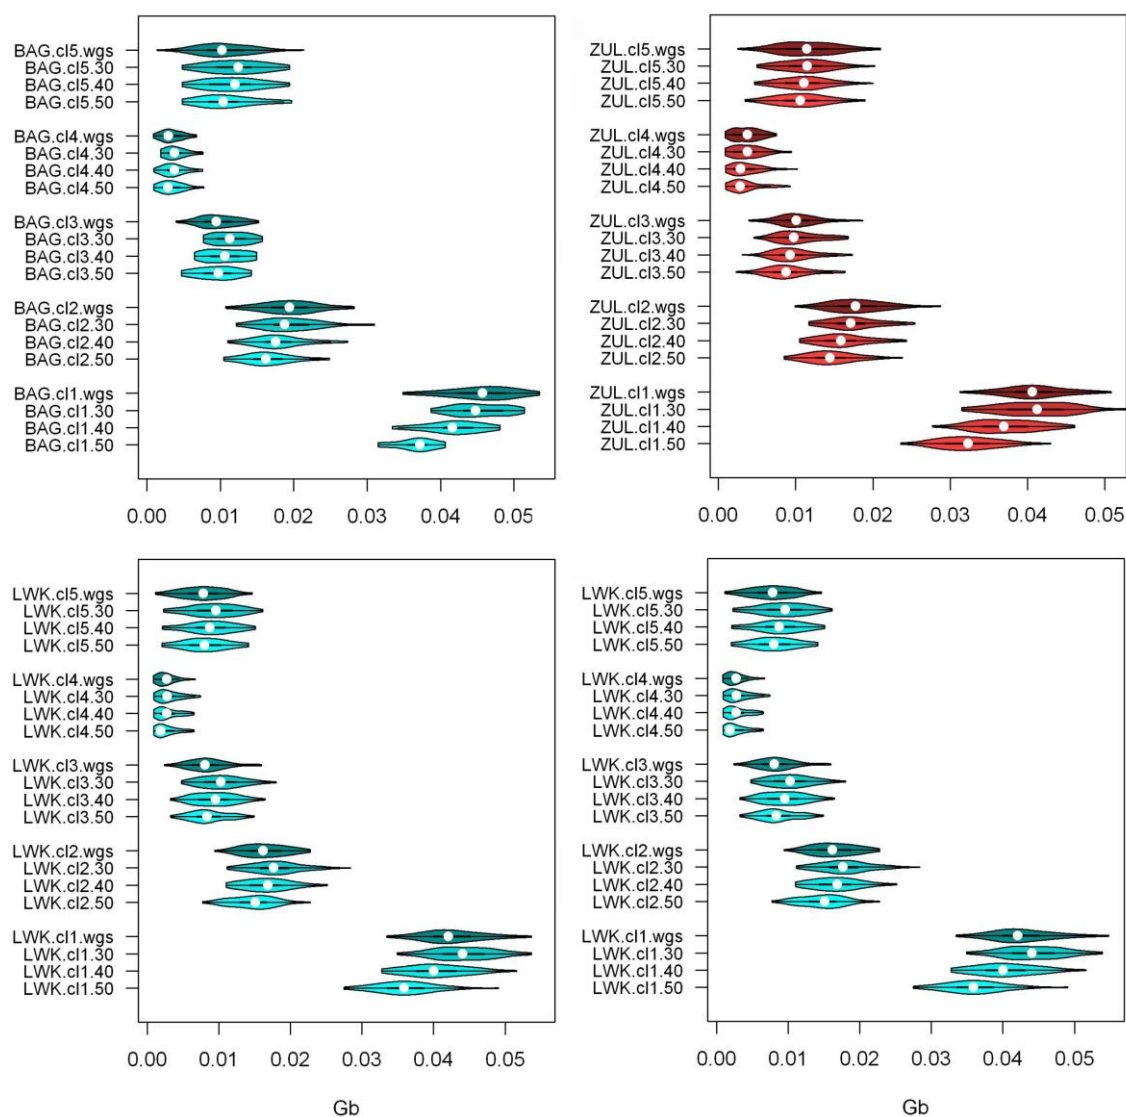

**Figure S1.** Violin plots of the sum of ROH for 5 classes of ROH length in African populations from 1KGP and AGVP with Array and WGS data available CI1:  $0.3\text{Mb} < \text{ROH} \leq 0.5\text{Mb}$ ; CI2:  $0.5\text{Mb} < \text{ROH} \leq 0.7\text{Mb}$ ; CI3:  $0.7\text{Mb} < \text{ROH} \leq 0.9\text{Mb}$ ; CI4:  $0.9\text{Mb} < \text{ROH} \leq 1.0\text{Mb}$ ; CI5:  $1\text{Mb} < \text{ROH} \leq 1.5\text{Mb}$ . BAG: Baganda population from AGVP; ZUL: Zulu population from the AGVP; LWK: Luhya population from the 1KGP; YRI: Yoruba population from the 1KGP. For each population, 30, 40 and 50 SNPs per window as PLINK conditions to obtain ROH with the Array data were compared with ROH from WGS data by using a window of 50 SNPs



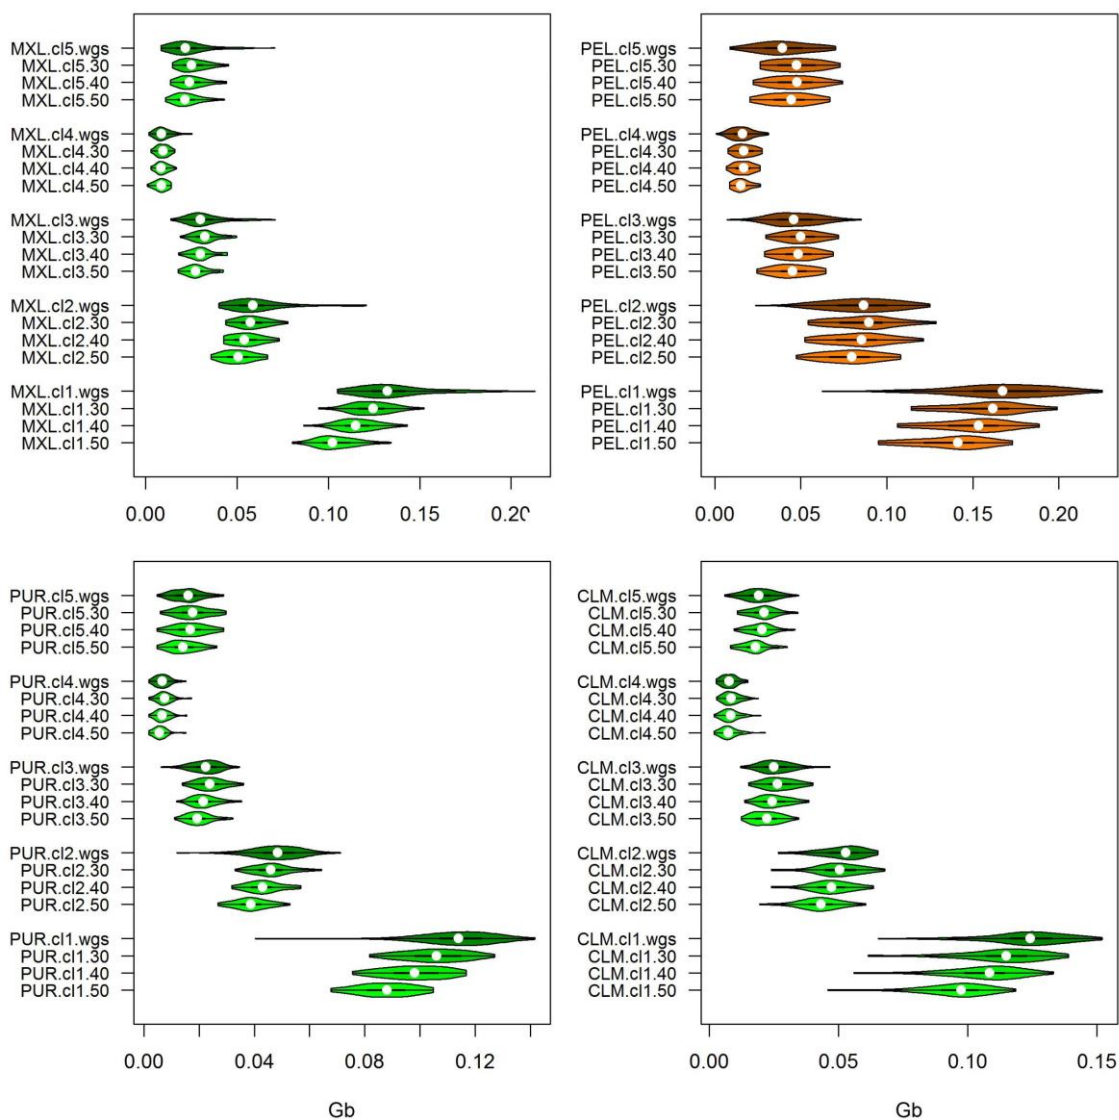

**Figure S2.** Violin plots of the sum of ROH for 5 classes of ROH length in American populations from 1KGP with Array and WGS data available. CI1:  $0.3\text{Mb} < \text{ROH} \leq 0.5\text{Mb}$ ; CI2:  $0.5\text{Mb} < \text{ROH} \leq 0.7\text{Mb}$ ; CI3:  $0.7\text{Mb} < \text{ROH} \leq 0.9\text{Mb}$ ; CI4:  $0.9\text{Mb} < \text{ROH} \leq 1.0\text{Mb}$ ; CI5:  $1\text{Mb} < \text{ROH} \leq 1.5\text{Mb}$ . For each population, 30, 40 and 50 SNPs per window as PLINK conditions to obtain ROH with the Array data were compared with ROH from WGS data by using a window of 50 SNPs.

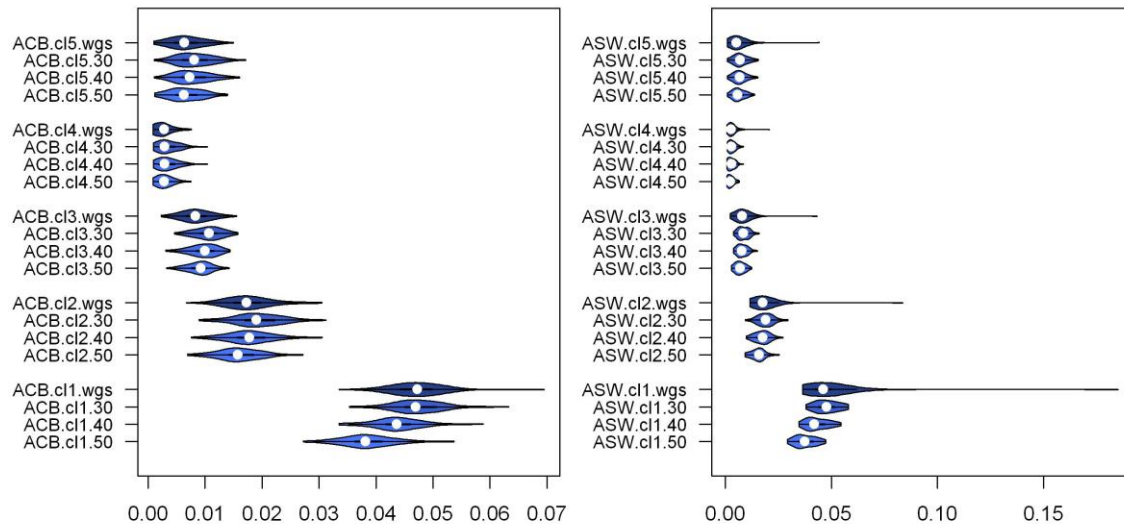

**Figure S3.** Violin plots of the sum of ROH for 5 classes of ROH length in admixed African - American populations from 1KG with Array and WGS data available. CI1:  $0.3\text{Mb} < \text{ROH} \leq 0.5\text{Mb}$ ; CI2:  $0.5\text{Mb} < \text{ROH} \leq 0.7\text{Mb}$ ; CI3:  $0.7\text{Mb} < \text{ROH} \leq 0.9\text{Mb}$ ; CI4:  $0.9\text{Mb} < \text{ROH} \leq 1.0\text{Mb}$ ; CI5:  $1\text{Mb} < \text{ROH} \leq 1.5\text{Mb}$ . For each population, 30, 40 and 50 SNPs per window as PLINK conditions to obtain ROH with the Array data were compared with ROH from WGS data by using a window of 50 SNPs.

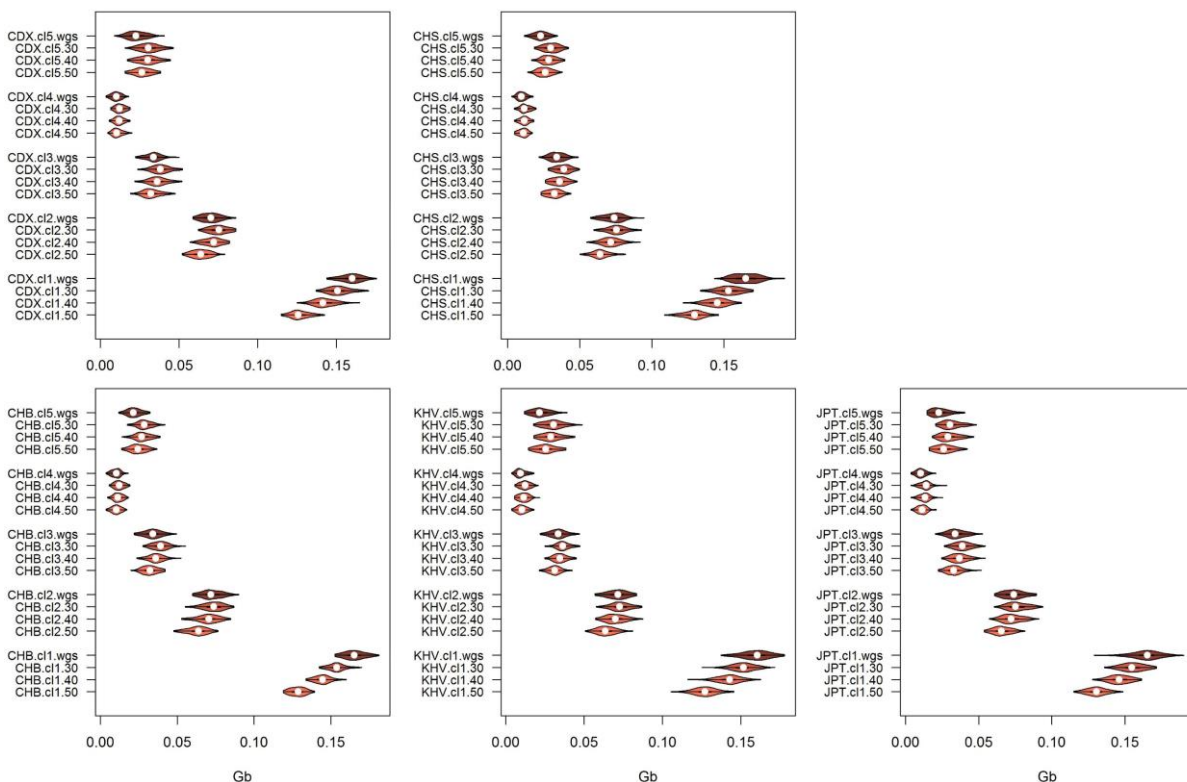

**Figure S4.** Violin plots of the sum of ROH for 5 classes of ROH length in Eastern Asia populations from 1KGP with Array and WGS data available. CI1:  $0.3\text{Mb} < \text{ROH} \leq 0.5\text{Mb}$ ; CI2:  $0.5\text{Mb} < \text{ROH} \leq 0.7\text{Mb}$ ; CI3:  $0.7\text{Mb} < \text{ROH} \leq 0.9\text{Mb}$ ; CI4:  $0.9\text{Mb} < \text{ROH} \leq 1.0\text{Mb}$ ; CI5:  $1\text{Mb} < \text{ROH} \leq 1.5\text{Mb}$ . For each population, 30, 40 and 50 SNPs per window as PLINK conditions to obtain ROH with the Array data were compared with ROH from WGS data by using a window of 50 SNPs.



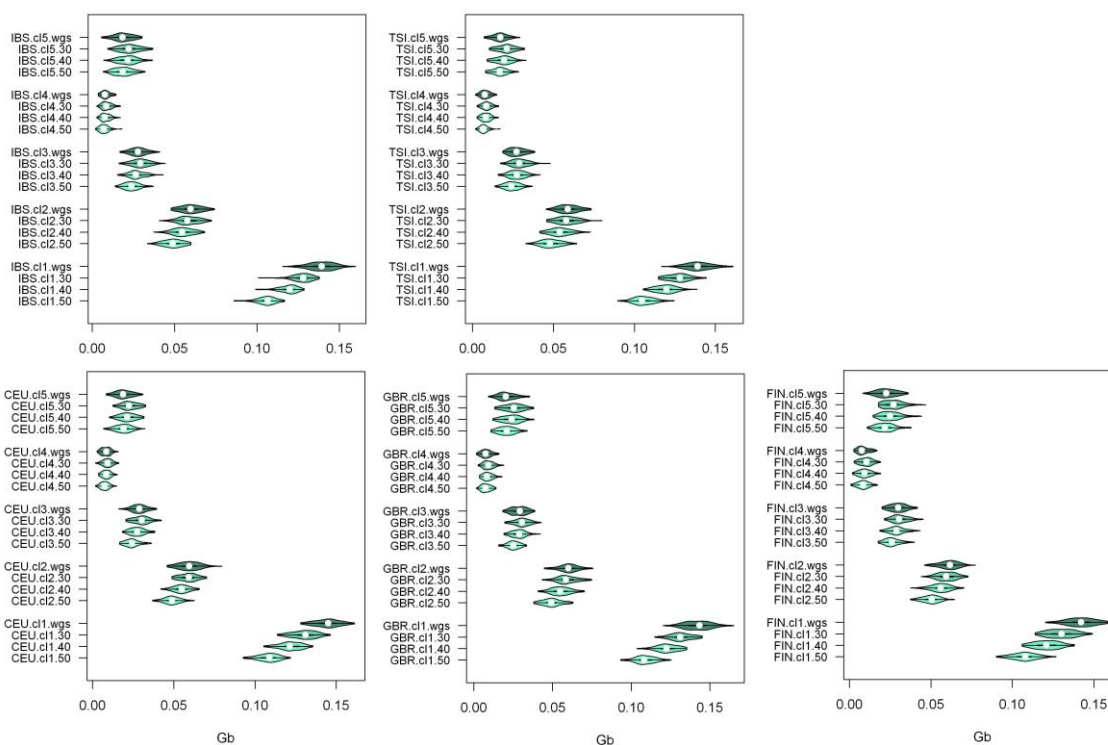

**Figure S5.** Violin plots of the sum of ROH for 5 classes of ROH length in European populations from 1KG with Array and WGS data available CI1:  $0.3\text{Mb} < \text{ROH} \leq 0.5\text{Mb}$ ; CI2:  $0.5\text{Mb} < \text{ROH} \leq 0.7\text{Mb}$ ; CI3:  $0.7\text{Mb} < \text{ROH} \leq 0.9\text{Mb}$ ; CI4:  $0.9\text{Mb} < \text{ROH} \leq 1.0\text{Mb}$ ; CI5:  $1\text{Mb} < \text{ROH} \leq 1.5\text{Mb}$ . For each population, 30, 40 and 50 SNPs per window as PLINK conditions to obtain ROH with the Array data were compared with ROH from WGS data by using a window of 50 SNPs

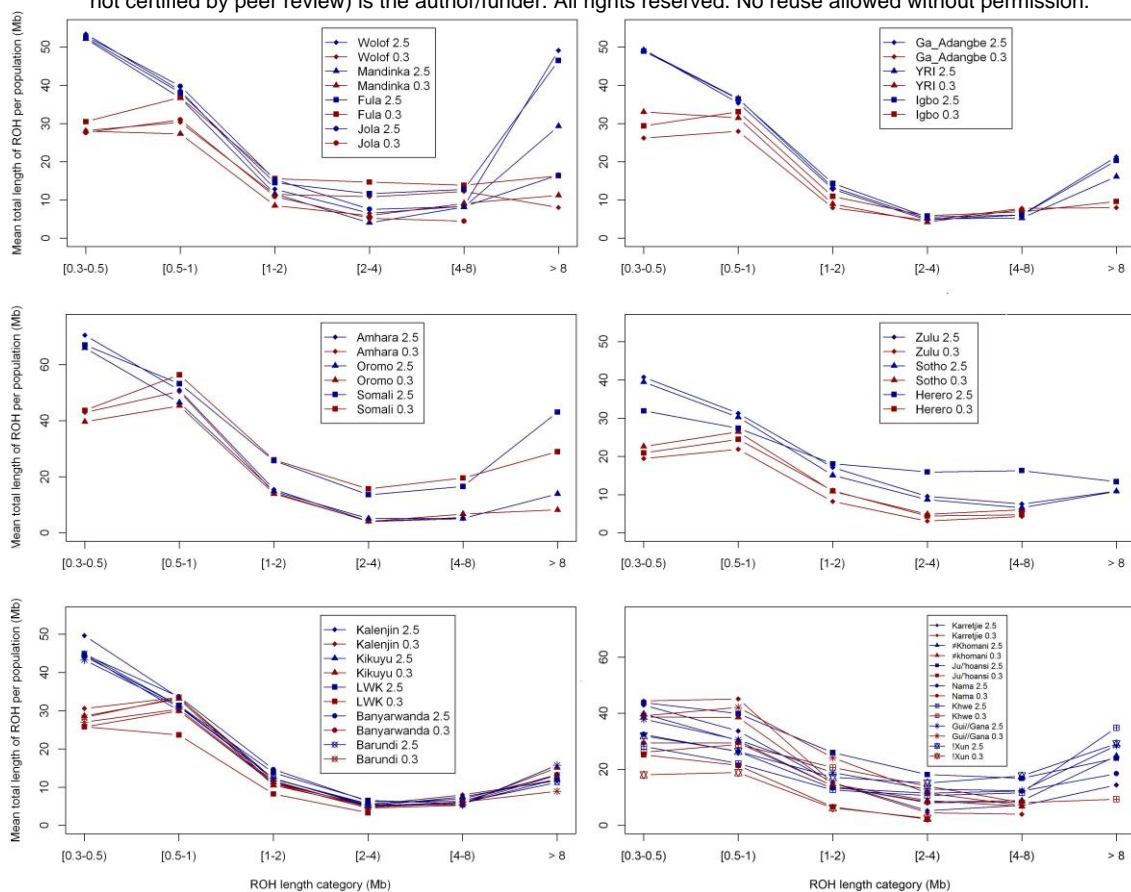

**Figure S6.** Mean total sum of ROH in different length categories. Blue colored lines represent the populations not being merged (Array of 2.5 M SNPs). Red colored lines represent the outcome of the different datasets (AGVP, Schlebusch et al. 2012, KGP, HGDP) after being merged (382,840 SNPs available).

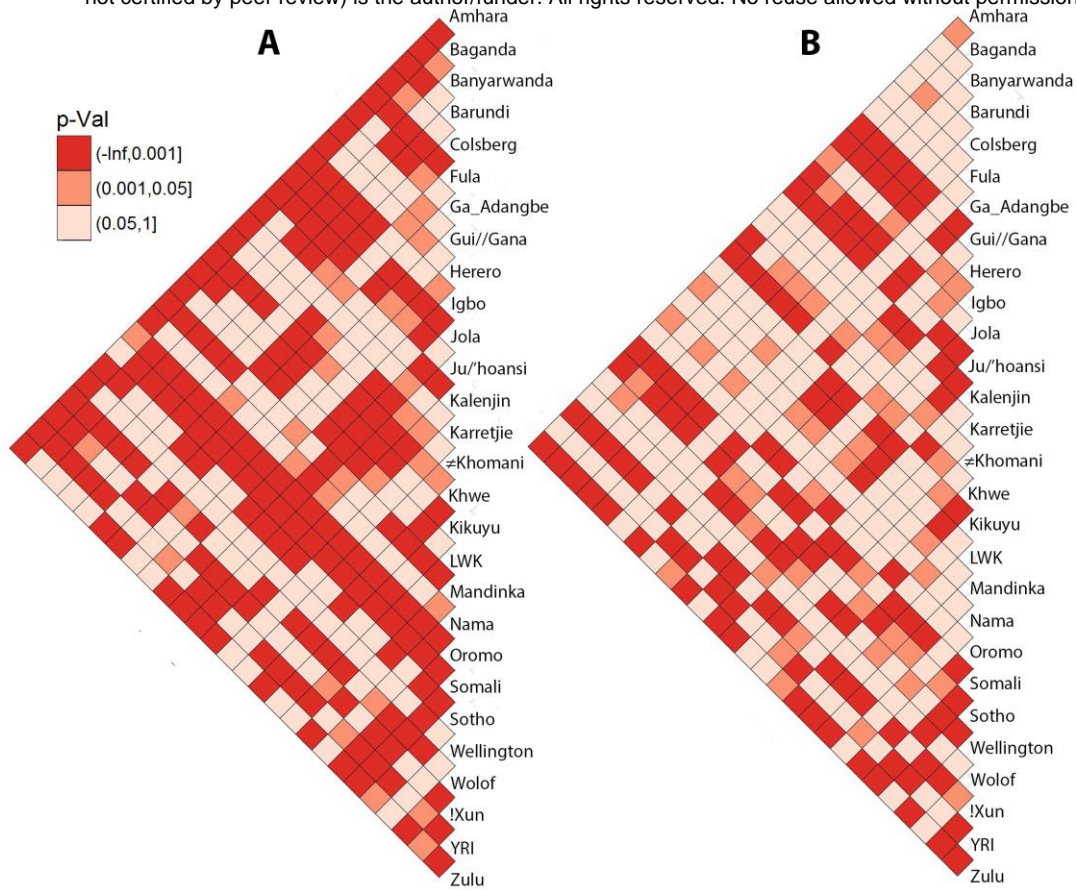

**Figure S7.** Pairwise comparisons of populations within Sub-Saharan Africa by the Mann-Whitney-Wilcoxon non-parametrical test (MWW) of ROH shorter than 1.5Mb (A) and ROH longer than 1.5Mb (B).

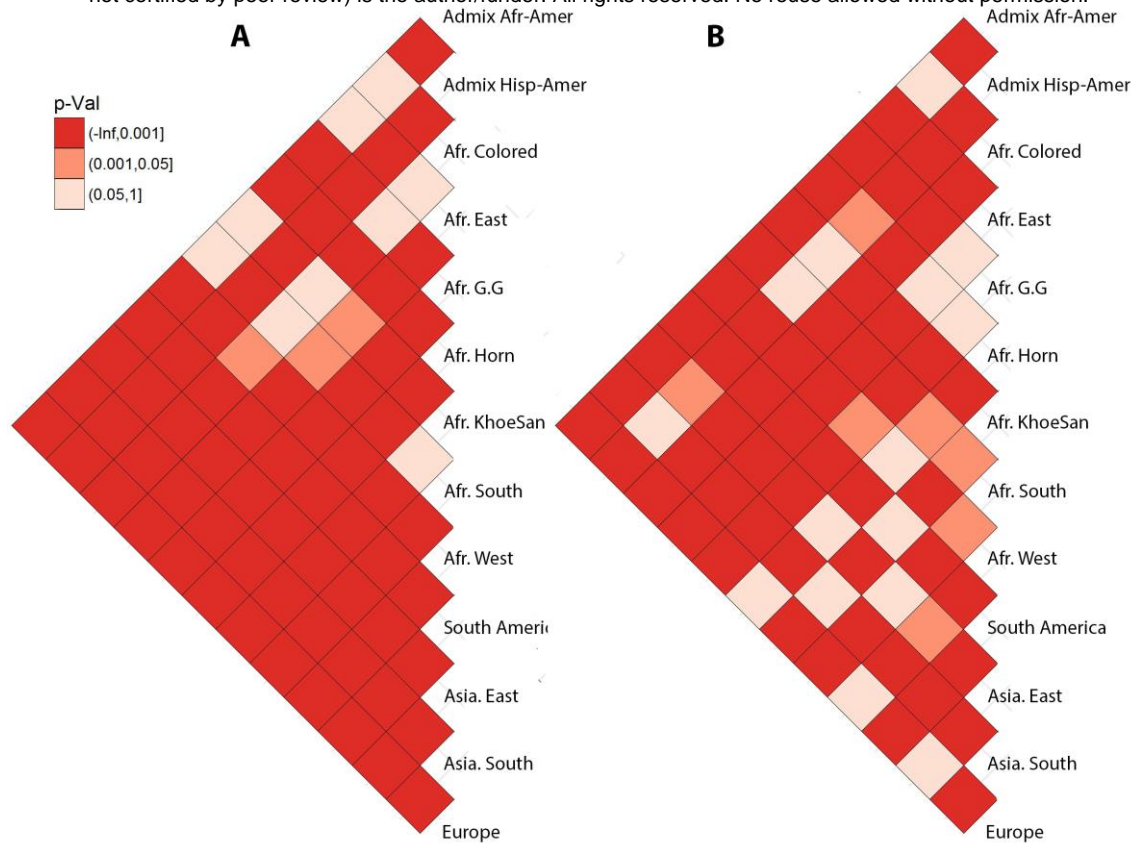

**Figure S8.** Pairwise comparisons of regional groups by the Mann-Whitney-Wilcoxon non-parametrical test (MWW) of ROH shorter than 1.5Mb (A) and ROH longer than 1.5Mb (B).
